# Supplementary material for: 1-Oxabicyclic β-lactams as new inhibitors of elongating MPT–a key enzyme responsible for assembly of cell-surface phosphoglycans of Leishmania parasite
Source: Royal Society of Chemistry journal article supplement (doi:10.1039/b418247b), 2005-01-01

## SUPPLEMENTARY INFORMATION

### **1-Oxabicyclic b-lactams as new inhibitors of elongating MPT—a key enzyme responsible for assembly of cell-surface phosphoglycans of *Leishmania* parasite**

*Dipali Ruhela, Patrali Chatterjee and Ram A. Vishwakarma\**  
Bio-organic Chemistry Lab, National Institute of Immunology,  
JNU Complex, New Delhi 10067, India

| <b>Table of Contents</b>                               | <b>Page</b> |
|--------------------------------------------------------|-------------|
| 1. General Experimental Methods                        | S2          |
| 2. <sup>1</sup> H NMR spectrum of compound <b>6</b>    | S3          |
| 3. <sup>13</sup> C NMR spectrum of compound <b>6</b>   | S4          |
| 4. <sup>1</sup> H NMR spectrum of compound <b>1</b>    | S5          |
| 5. <sup>13</sup> C NMR spectrum of compound <b>1</b>   | S6          |
| 6. <sup>1</sup> H NMR spectrum of compound <b>7</b>    | S7          |
| 7. <sup>13</sup> C NMR spectrum of compound <b>7</b>   | S8          |
| 8. <sup>1</sup> H NMR spectrum of compound <b>2</b>    | S9          |
| 9. <sup>13</sup> C NMR spectrum of compound <b>2</b>   | S10         |
| 10. <sup>1</sup> H NMR spectrum of compound <b>9</b>   | S11         |
| 11. <sup>13</sup> C NMR spectrum of compound <b>9</b>  | S12         |
| 12. <sup>1</sup> H NMR spectrum of compound <b>10</b>  | S13         |
| 13. <sup>13</sup> C NMR spectrum of compound <b>10</b> | S14         |
| 14. <sup>1</sup> H NMR spectrum of compound <b>11</b>  | S15         |
| 15. <sup>13</sup> C NMR spectrum of compound <b>11</b> | S16         |
| 16. <sup>1</sup> H NMR spectrum of compound <b>12</b>  | S17         |
| 17. <sup>13</sup> C NMR spectrum of compound <b>12</b> | S18         |
| 18. <sup>1</sup> H NMR spectrum of compound <b>13</b>  | S19         |
| 19. <sup>1</sup> H NMR spectrum of compound <b>13</b>  | S20         |

## General Experimental Methods

Solvents were purified according to the standard procedures, and reagents used were of highest purity available. The NMR spectra ( $^1\text{H}$ ,  $^{13}\text{C}$ ,  $^{31}\text{P}$ , 2D  $^1\text{H}$ - $^1\text{H}$  COSY and  $^1\text{H}$ - $^{13}\text{C}$  HETCOR, HMQC and HMBC) were recorded on a 300 MHz spectrometer (Bruker, Avance series) fitted with pulse-field gradient probe, and trimethylsilane (TMS) or residual resonance of deuterated solvent were used as internal reference. For  $^{31}\text{P}$  NMR spectra, phosphoric acid was used as external reference.  $^{13}\text{C}$  NMR spectra were broadband  $^1\text{H}$  decoupled or inverse HMQC experiments. Chemical shifts are expressed in ppm and coupling constants  $J$  in Hz. Where appropriate, signal assignments were made by DEPT,  $^1\text{H}$ - $^1\text{H}$  COSY and  $^1\text{H}$ - $^{13}\text{C}$  HETCOR experiments. Low and high resolution mass spectra were recorded on Platform-II or LCT spectrometer (Micromass-Waters) respectively using acetonitrile-water (1:1) mobile phase. Optical rotations were measured at ambient temperature with a digital Perkin-Elmer 141 polarimeter. Thin layer chromatography was performed on Merck Kieselgel 60  $\text{F}_{254}$  plates, compounds visualized either by viewing with a UV lamp (254 nm), or by dipping into ammonium-molybdate/ceric-sulfate developing reagent followed by heating. Silica column chromatography was carried out with silica gel 60 (60-120 mesh).

Current Data Parameters  
 NAME DR-HBLact  
 EXPNO 1  
 PROCNO 1

F2 - Acquisition Parameters

Date\_ 500000  
 Time 9.51  
 INSTRUM drx300  
 PROBHD 5 mm GNP 1H  
 PULPROG zg  
 TD 32768  
 SOLVENT CDCl3  
 NS 11  
 DS 0  
 SWH 3591.954 Hz  
 FIDRES 0.109618 Hz  
 AQ 4.5613556 sec  
 RG 90.5  
 DW 139.200 usec  
 DE 4.50 usec  
 TE 300.0 K  
 D1 1.0000000 sec  
 P1 8.40 usec  
 DE 4.50 usec  
 SF01 300.1315200 MHz  
 NUC1 1H  
 PL1 -4.00 dB

F2 - Processing parameters

SI 32768  
 SF 300.1300086 MHz  
 MDW EM  
 SSB 0  
 LB 0.00 Hz  
 GB 0  
 PC 1.00

1D NMR plot parameters

CX 20.00 cm  
 F1P 10.000 ppm  
 F1 3001.30 Hz  
 F2P 0.000 ppm  
 F2 0.00 Hz  
 PPMCM 0.50000 ppm/cm  
 HZCM 150.06500 Hz/cm

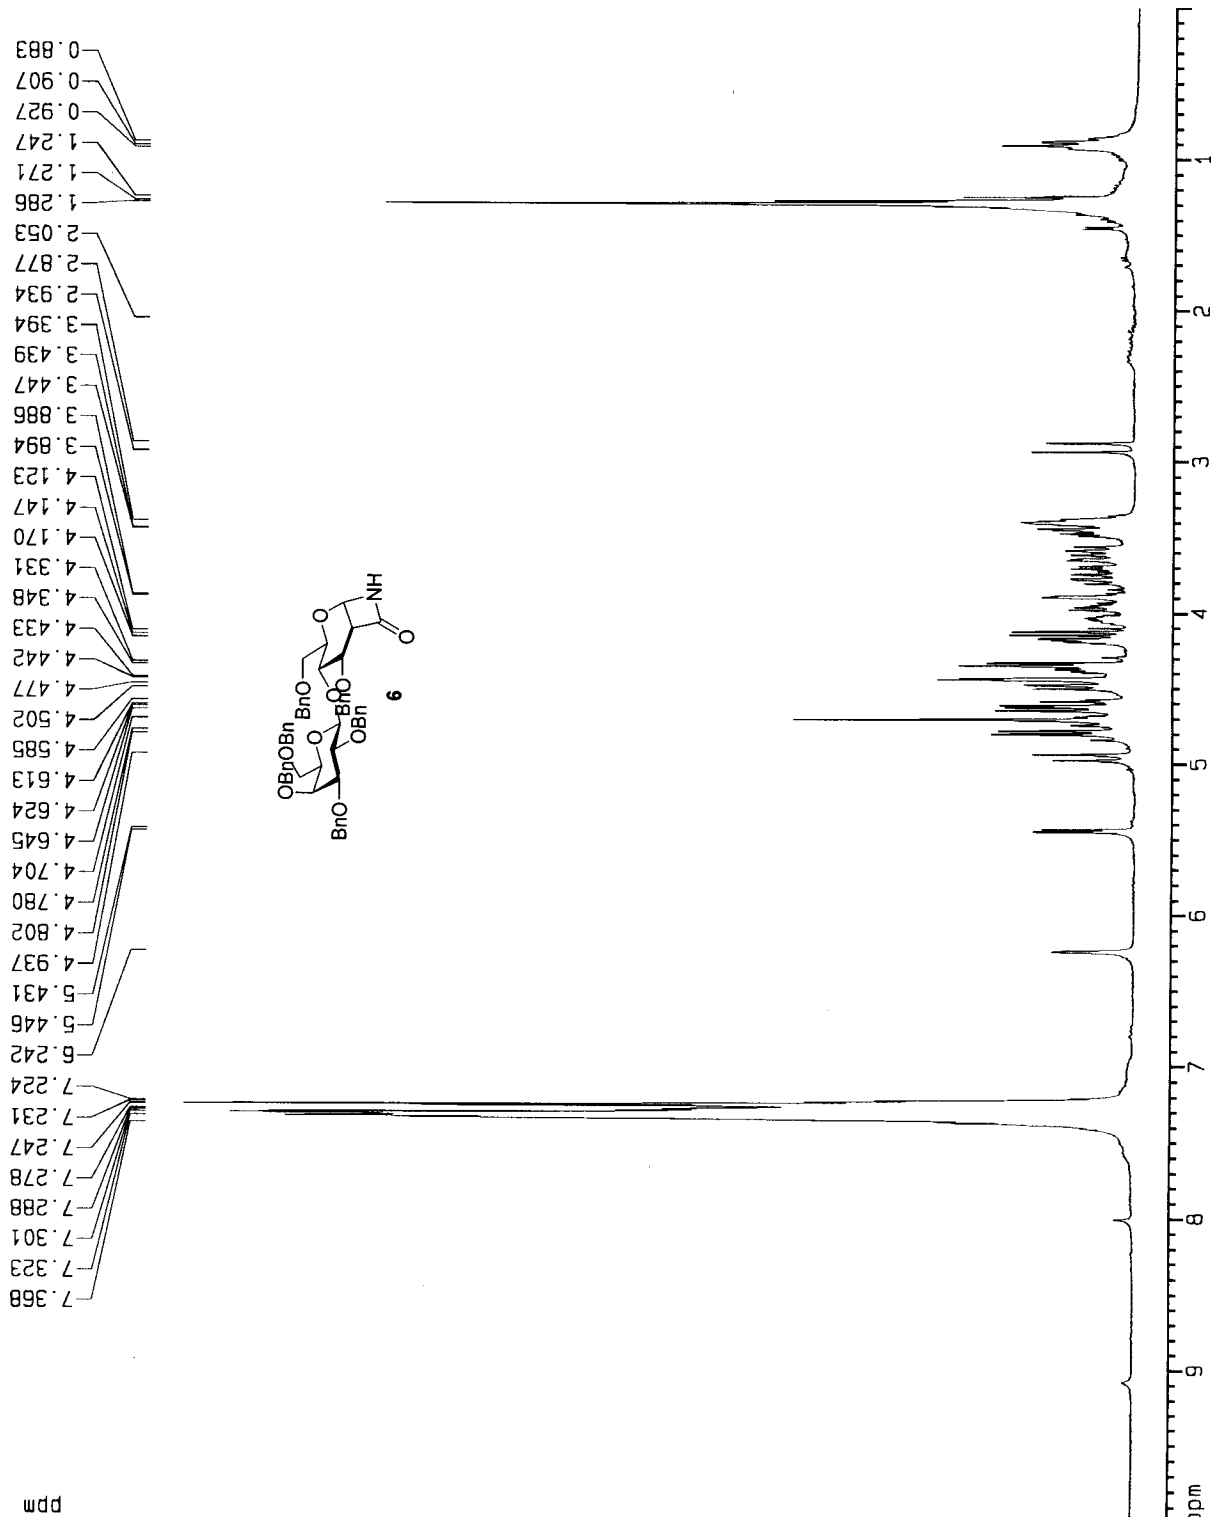

Current Data Parameters  
 NAME DR-HBLact.13C  
 EXPNO 1  
 PROCNO 1

F2 - Acquisition Parameters

Date\_ 500000  
 Time 10.24  
 INSTRUM drx300  
 PROBHD 5 mm QNP 1H  
 PULPROG zgpg  
 TD 65536  
 SOLVENT CDCl3  
 NS 1380  
 DS 0  
 SWH 22675.736 Hz  
 FIDRES 0.346004 Hz  
 AQ 1.4451188 sec  
 RG 8192  
 DW 22.050 usec  
 DE 4.50 usec  
 TE 300.0 K  
 d11 0.0300000 sec  
 PL12 19.00 dB  
 CPDPRG2 waltz16  
 PCPD2 100.00 usec  
 SF02 300.1322735 MHz  
 NUC2 1H  
 PL2 19.00 dB  
 D1 2.0000000 sec  
 P1 5.70 usec  
 DE 4.50 usec  
 SF01 75.4735300 MHz  
 NUC1 13C  
 PL1 -4.00 dB

F2 - Processing parameters

SI 32768  
 SF 75.4677569 MHz  
 MDW EM  
 SSB 0  
 LB 1.00 Hz  
 GB 0  
 PC 1.00

1D NMR plot parameters

CX 20.00 cm  
 F1P 200.000 ppm  
 F1 15093.55 Hz  
 F2P 0.000 ppm  
 F2 0.00 Hz  
 PPMCM 10.00000 ppm/cm  
 HZCM 754.67761 Hz/cm

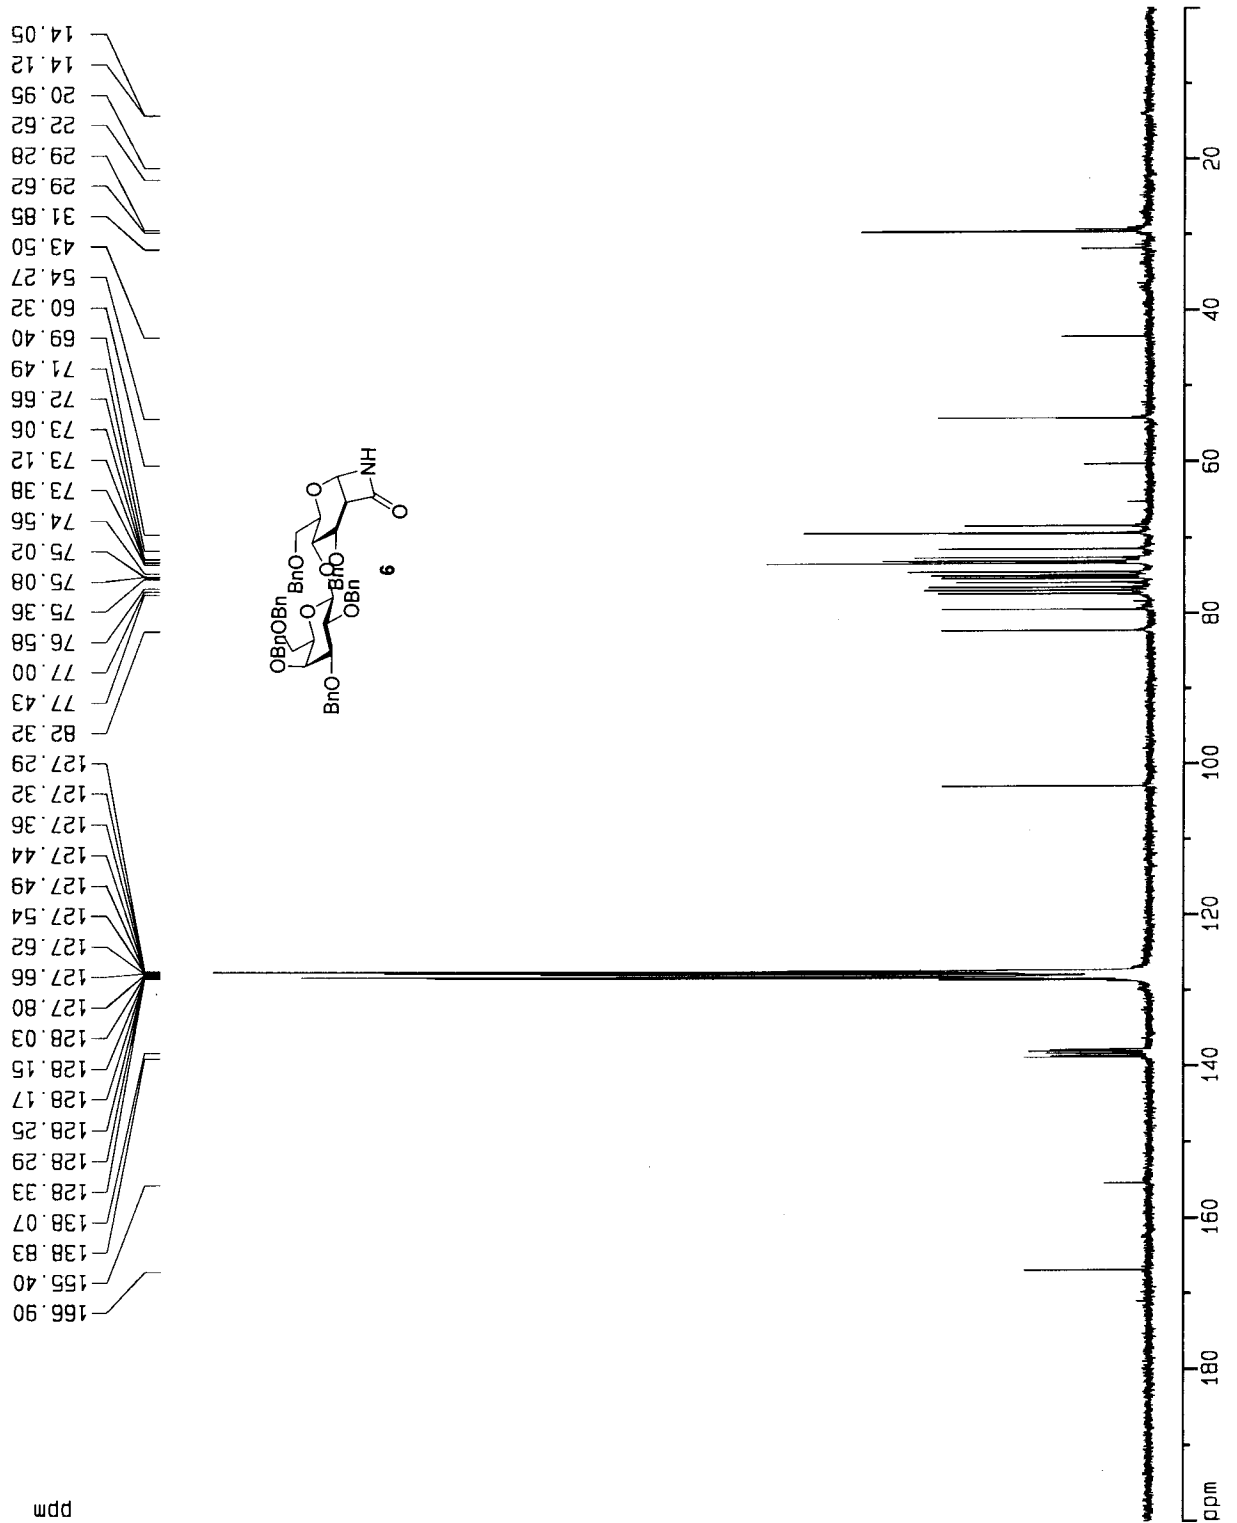

Current Data Parameters  
 NAME DR-6-190  
 EXPNO 1  
 PROCNO 1

F2 - Acquisition Parameters

Date\_ 500000  
 Time 10.08  
 INSTRUM drx300  
 PROBH1 5 mm QNP 1H  
 PULPROG zg  
 TD 32768  
 SOLVENT MeOH  
 NS 24  
 DS 0  
 SWH 3591.954 Hz  
 FIDRES 0.109618 Hz  
 AQ 4.5613556 sec  
 RG 362  
 DW 139.200 usec  
 DE 4.50 usec  
 TE 300.0 K  
 O1 1.0000000 sec  
 P1 8.40 usec  
 DE 4.50 usec  
 SFO1 300.1315200 MHz  
 NUC1 1H  
 PL1 -4.00 dB

F2 - Processing parameters

SI 32768  
 SF 300.1300086 MHz  
 WDW EM  
 SSB 0  
 LB 0.00 Hz  
 GB 0  
 PC 1.00

1D NMR plot parameters

CX 20.00 cm  
 F1P 10.000 ppm  
 F1 3001.30 Hz  
 F2P 0.000 ppm  
 F2 0.00 Hz  
 PPMCM 0.50000 ppm/cm  
 HZCM 150.06500 Hz/cm

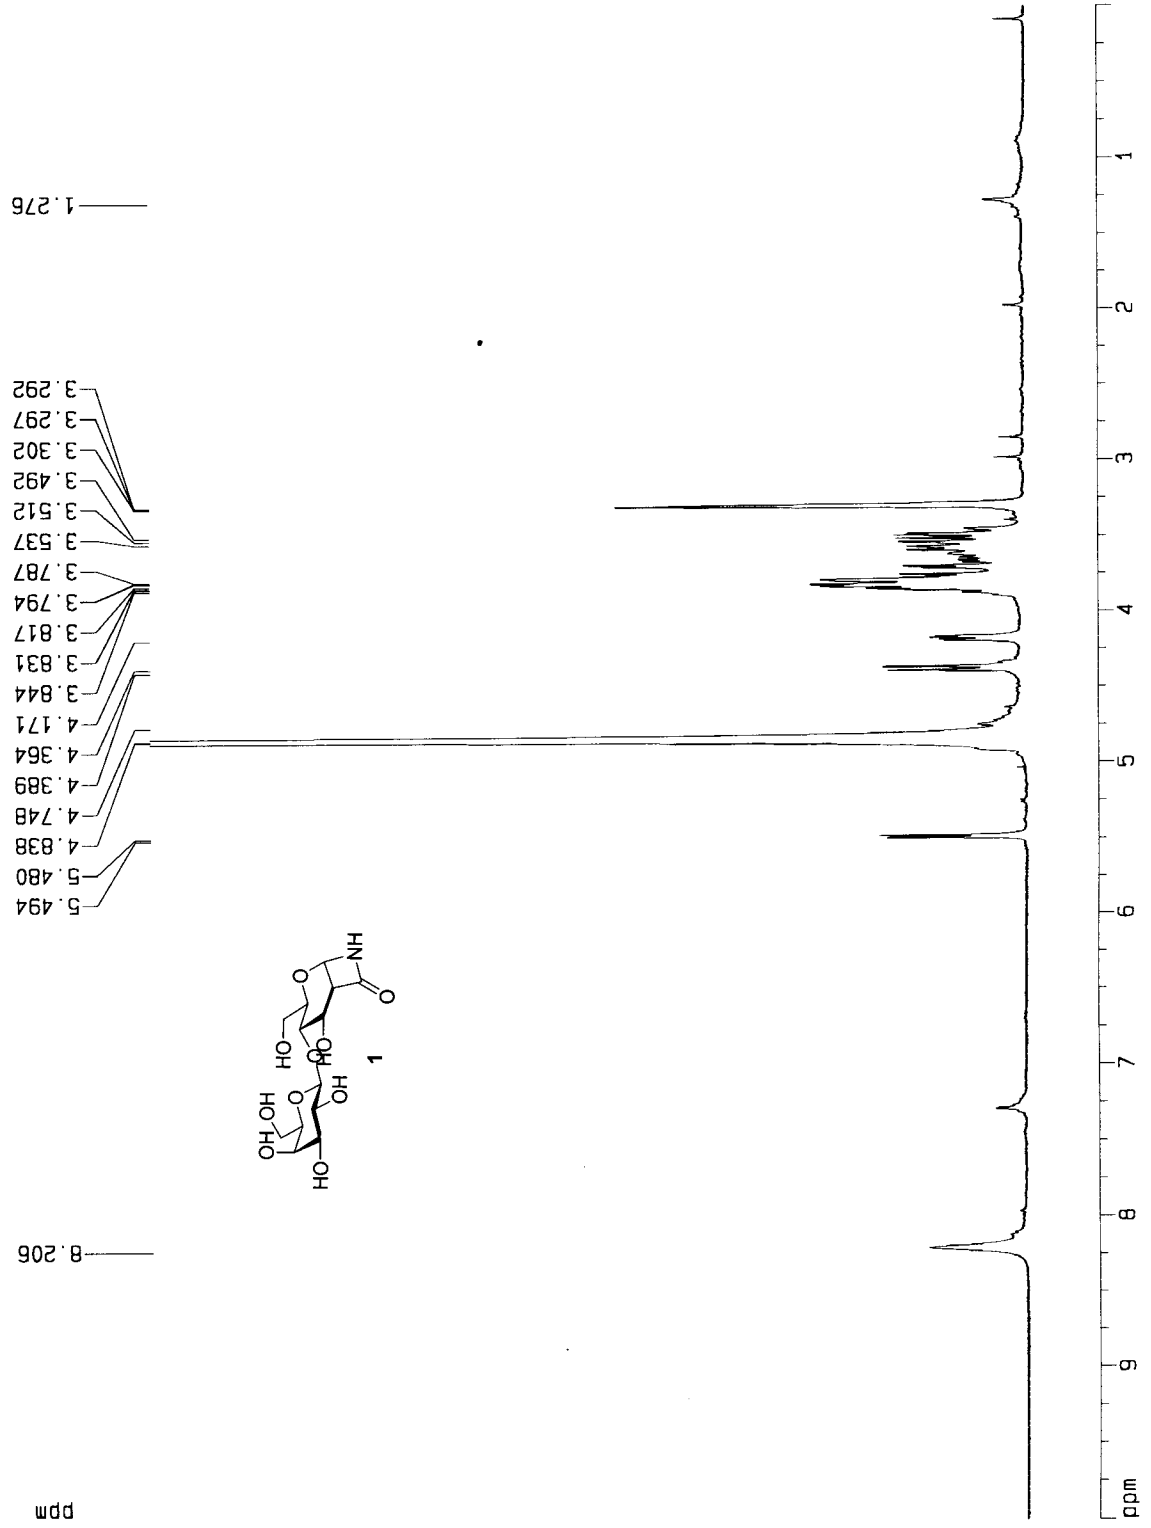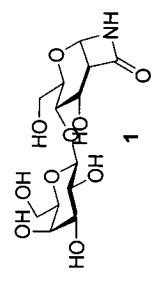

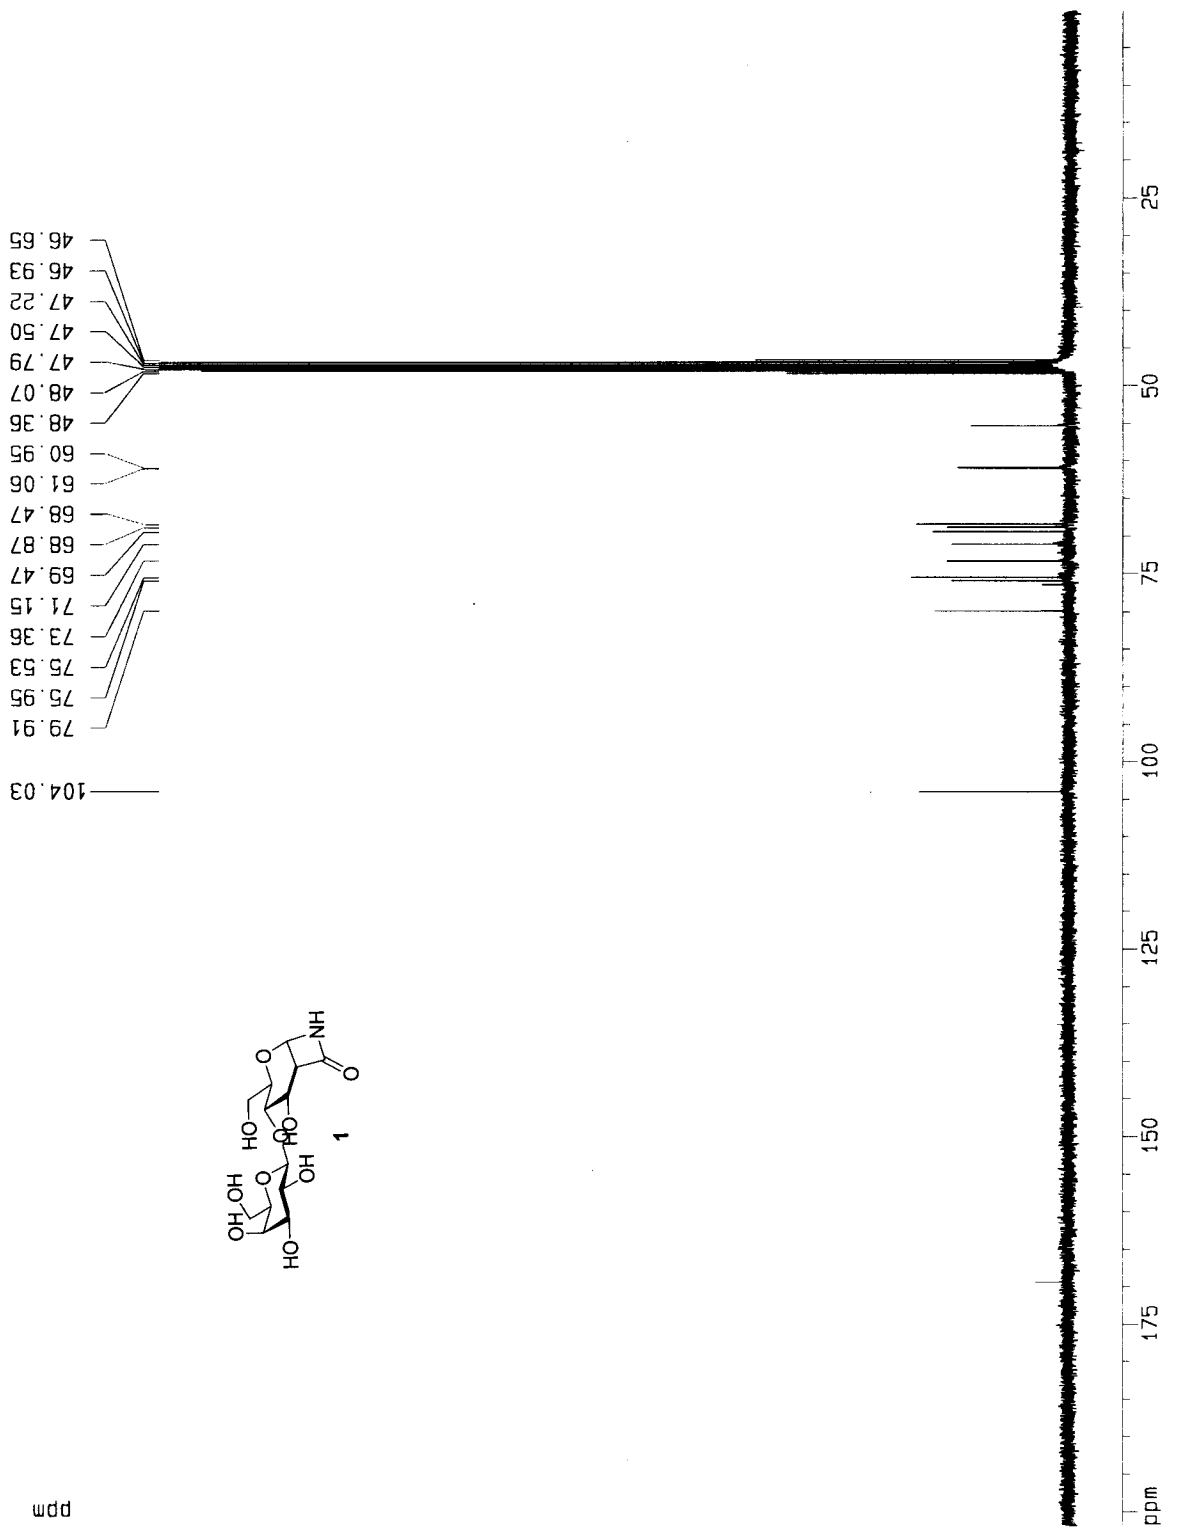

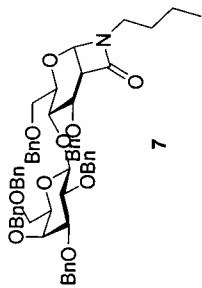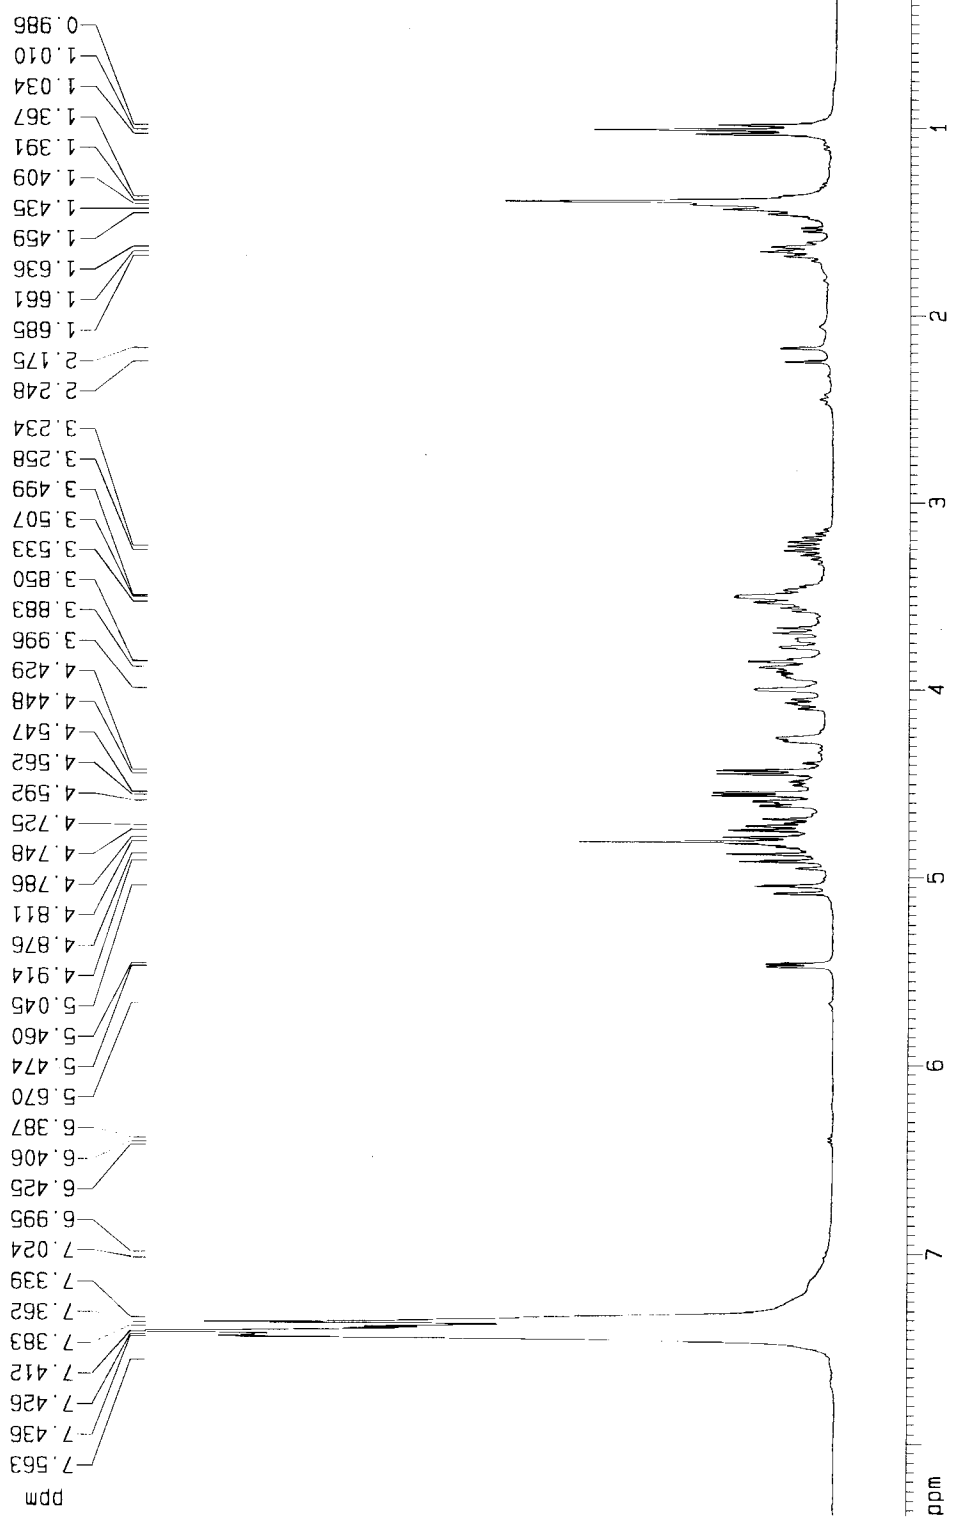

DR-6-188-13C

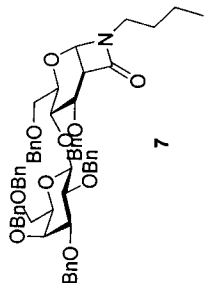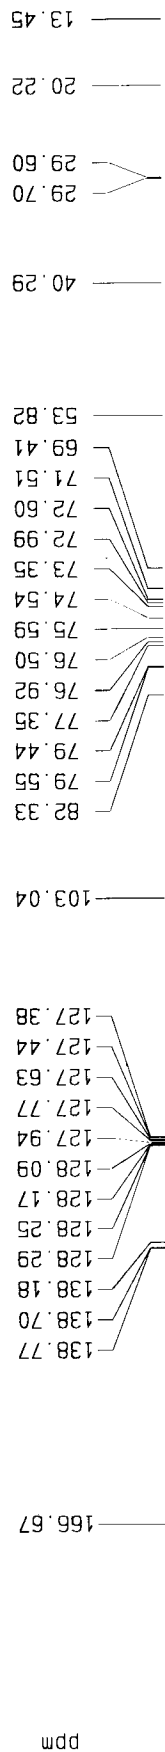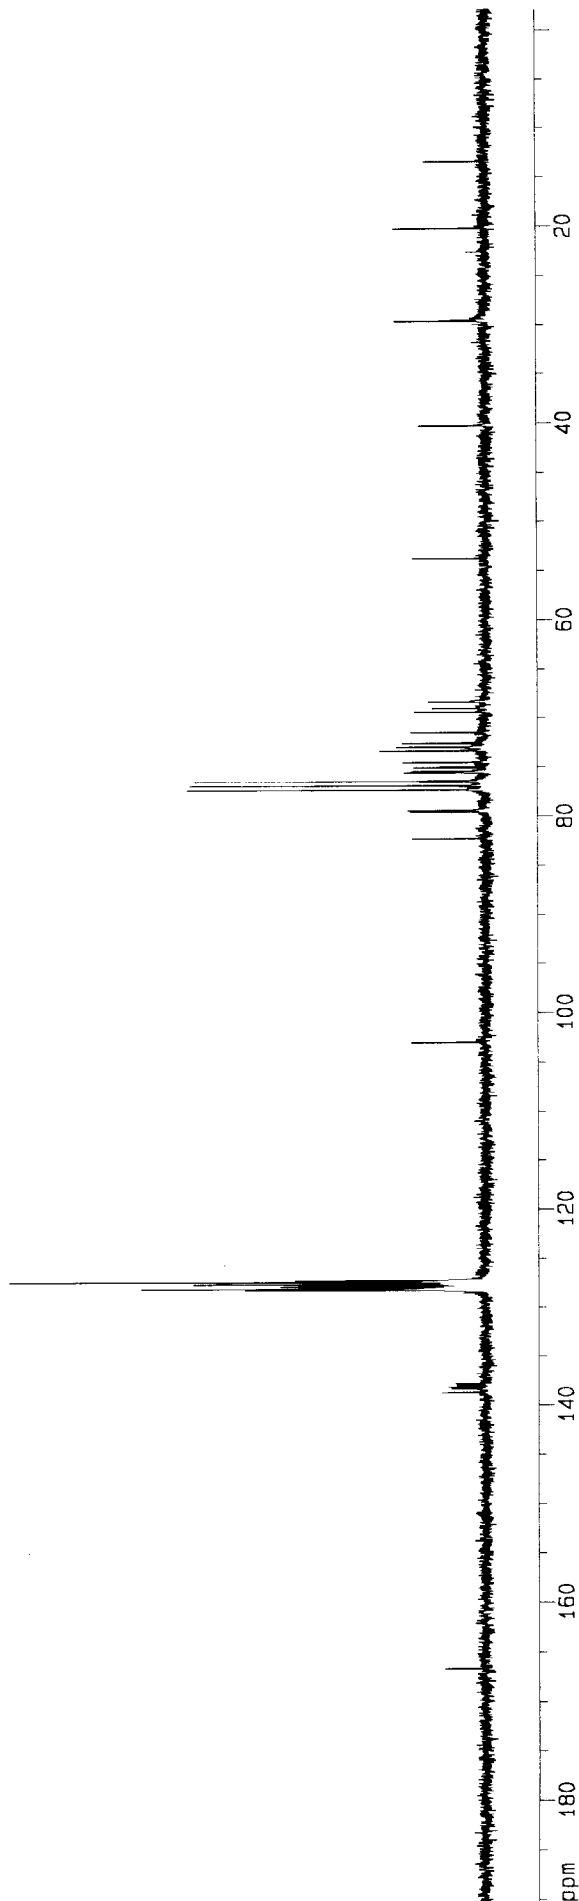



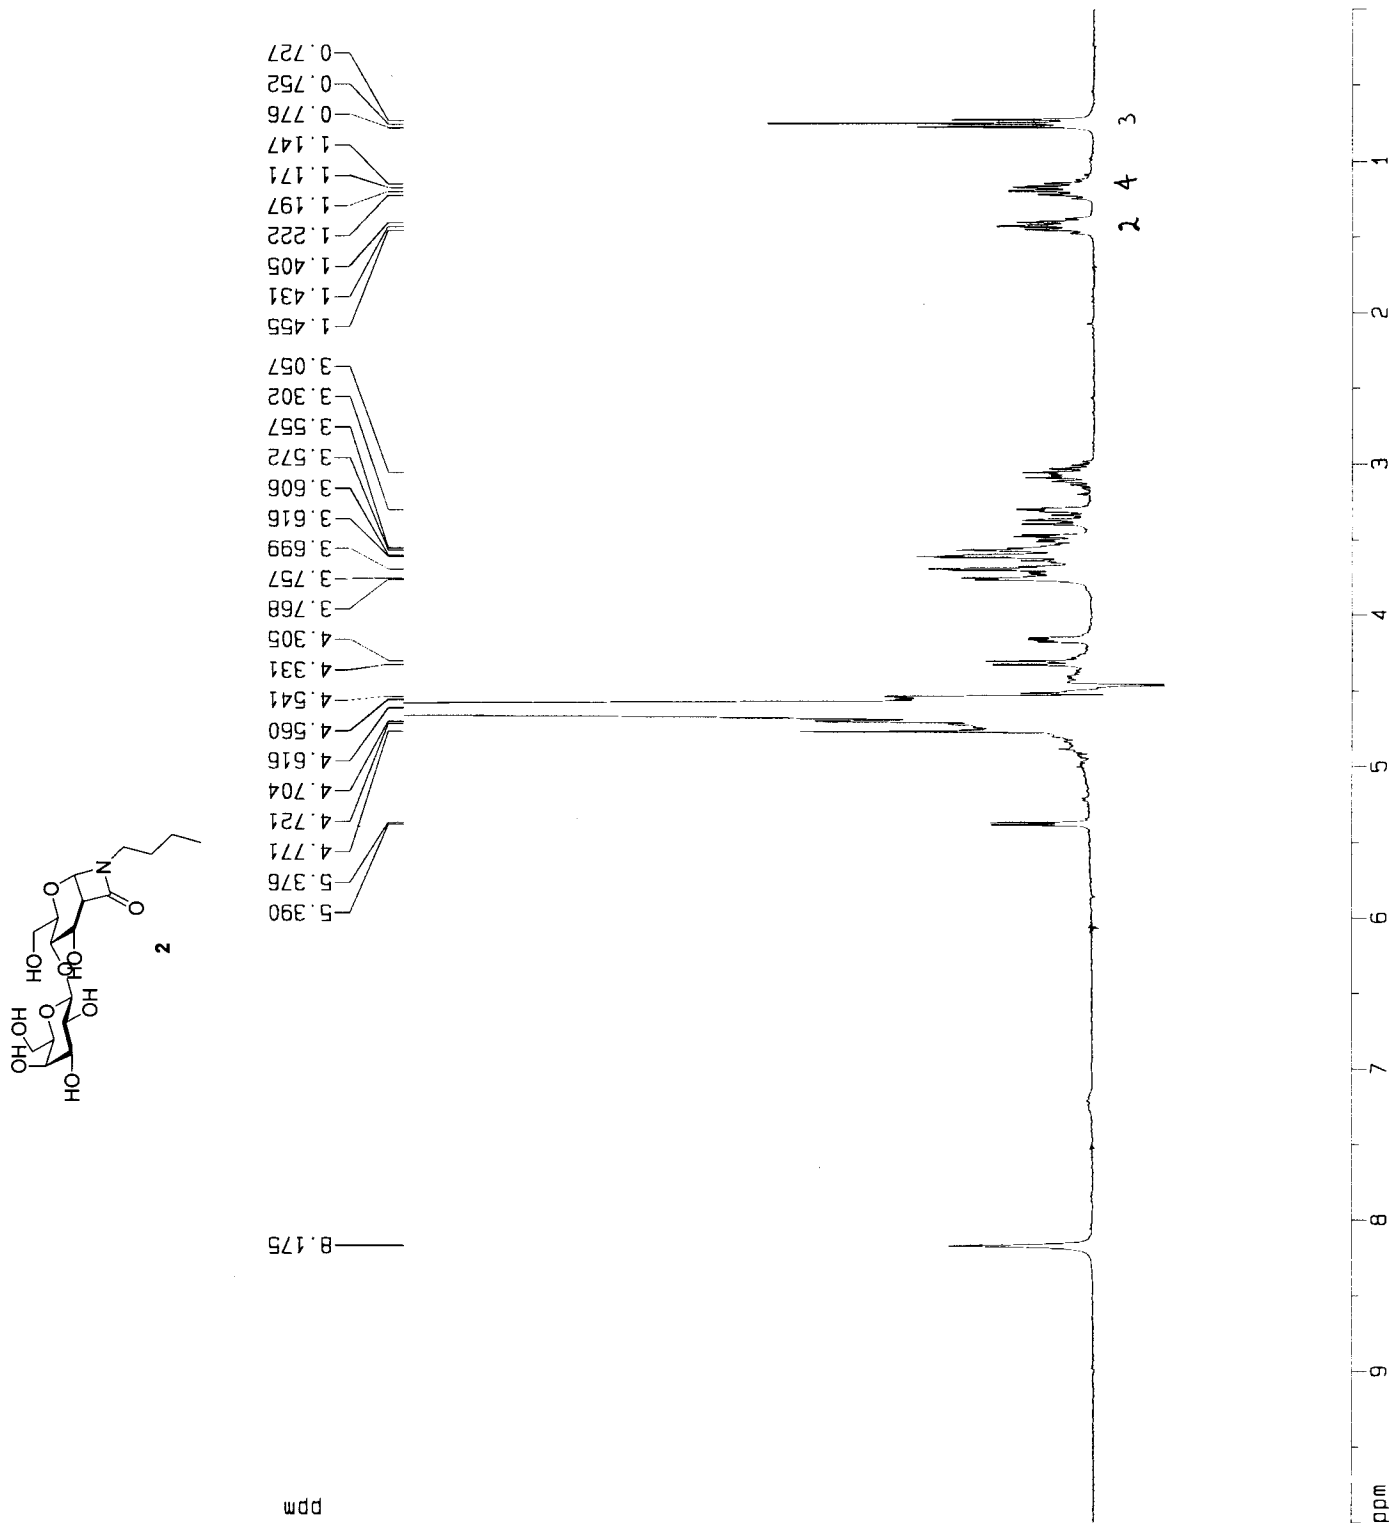

Current Data Parameters  
 NAME DR-6-192.13C  
 EXPNO 1  
 PROCNO 1

F2 - Acquisition Parameters

Date\_ 500000  
 Time 16.55  
 INSTRUM drx300  
 PROBHD 5 mm GNP 1H  
 PULPROG zgdc  
 TD 65536  
 SOLVENT D2O  
 NS 10000  
 DS 0  
 SWH 22675.736 Hz  
 FIDRES 0.346004 Hz  
 AQ 1.4451188 sec  
 RG 9195.2  
 DW 22.050 usec  
 DE 4.50 usec  
 TE 300.0 K  
 d11 0.030000 sec  
 PL12 19.00 dB  
 CPDPRG2 waltz16  
 PCPD2 100.00 usec  
 SF02 300.1322735 MHz  
 NUC2 1H  
 PL2 19.00 dB  
 D1 2.00000000 sec  
 P1 5.70 usec  
 DE 4.50 usec  
 SF01 75.4735300 MHz  
 NUC1 13C  
 PL1 -4.00 dB

F2 - Processing parameters

SI 32768  
 SF 75.4677569 MHz  
 WDW EM  
 SSB 0  
 LB 0.50 Hz  
 GB 0  
 PC 1.00

1D NMR plot parameters

CX 20.00 cm  
 F1P 200.000 ppm  
 F1 15093.55 Hz  
 F2P -20.000 ppm  
 F2 -1509.36 Hz  
 PPMCM 11.00000 ppm/cm  
 HZCM 830.14532 Hz/cm

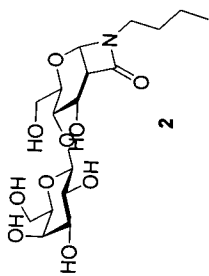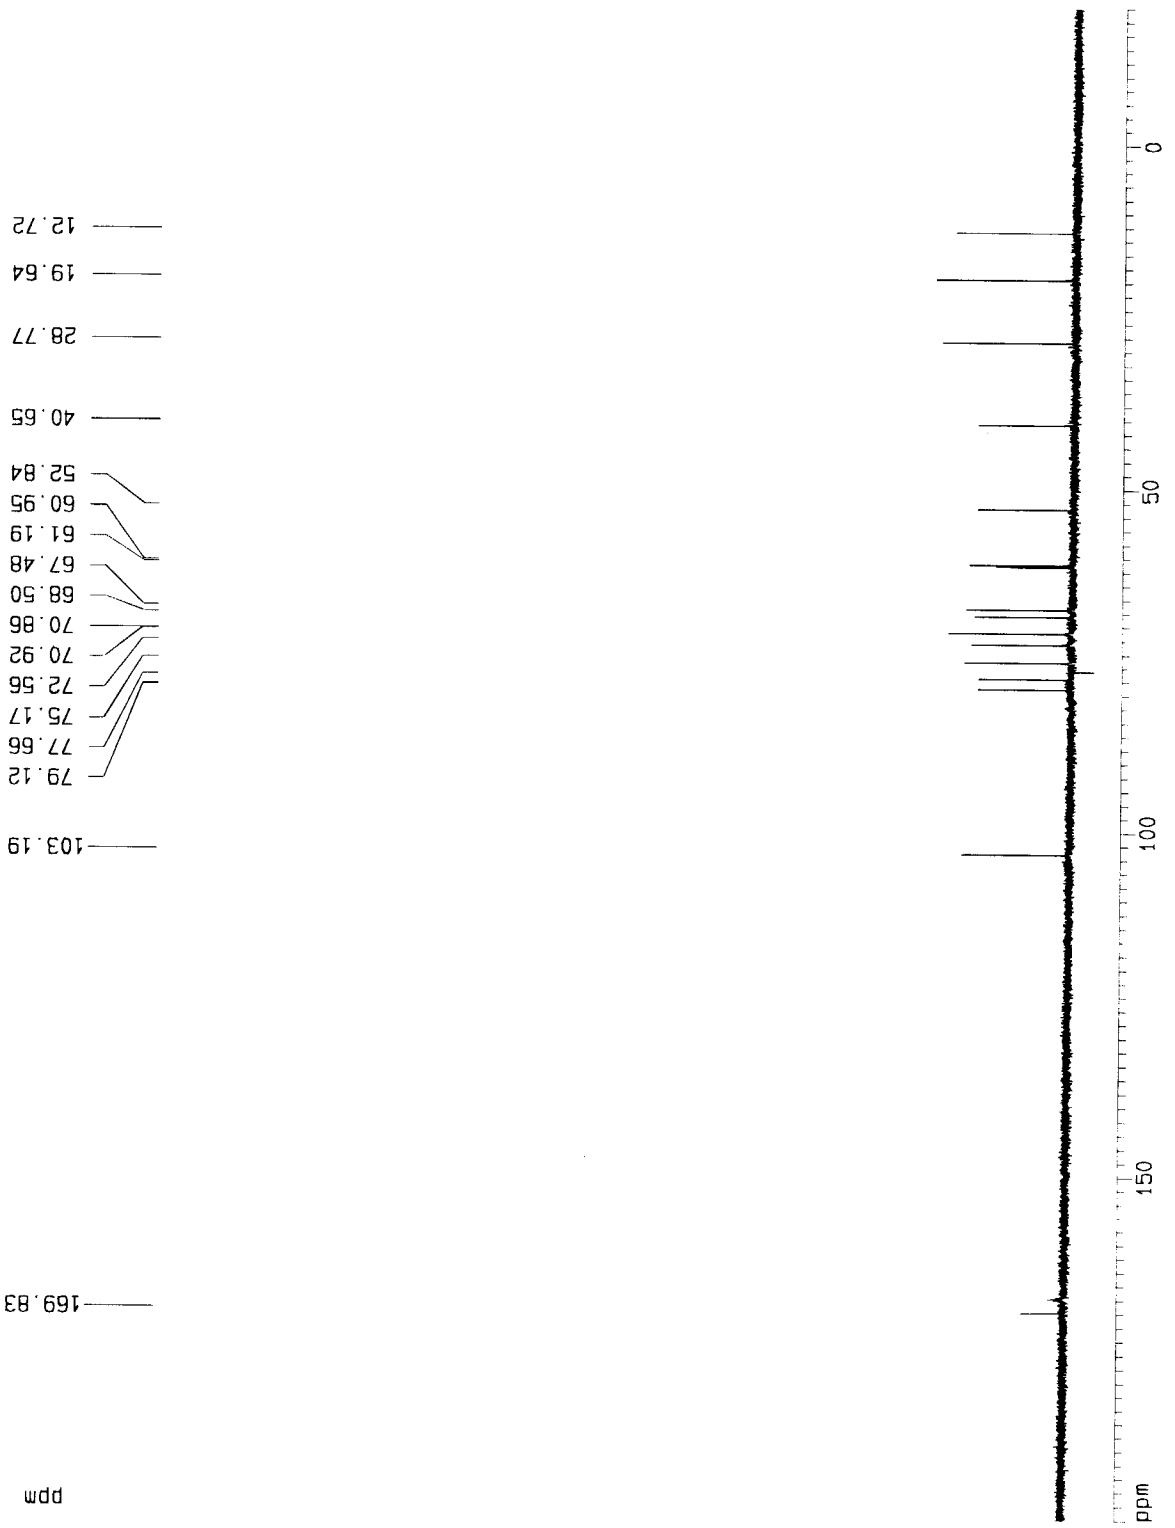

Current Data Parameters  
 NAME GalMan-octaAc  
 EXPNO 1  
 PROCNO 1

F2 - Acquisition Parameters

Date\_ 500000  
 Time 16.37  
 INSTRUM drx300  
 PROBHD 5 mm GNP 1H  
 PULPROG zg  
 TD 32768  
 SOLVENT CDC13  
 NS 21  
 DS 0  
 SMH 3591.954 Hz  
 FIDRES 0.109618 Hz  
 AQ 4.5613556 sec  
 RG 64  
 DW 139.200 usec  
 DE 4.50 usec  
 TE 300.0 K  
 D1 1.00000000 sec  
 P1 8.40 usec  
 DE 4.50 usec  
 SF01 300.1315200 MHz  
 NUC1 1H  
 PL1 -4.00 dB

F2 - Processing parameters

SI 32768  
 SF 300.1300086 MHz  
 WDW EM  
 SSB 0  
 LB 0.00 Hz  
 GB 0  
 PC 1.00

1D NMR plot parameters

CX 20.00 cm  
 F1 10.000 ppm  
 F2 3001.30 Hz  
 F2 0.000 ppm  
 F2 0.00 Hz  
 PPMCM 0.50000 ppm/cm  
 HZCM 150.06499 Hz/cm

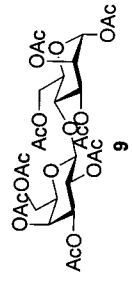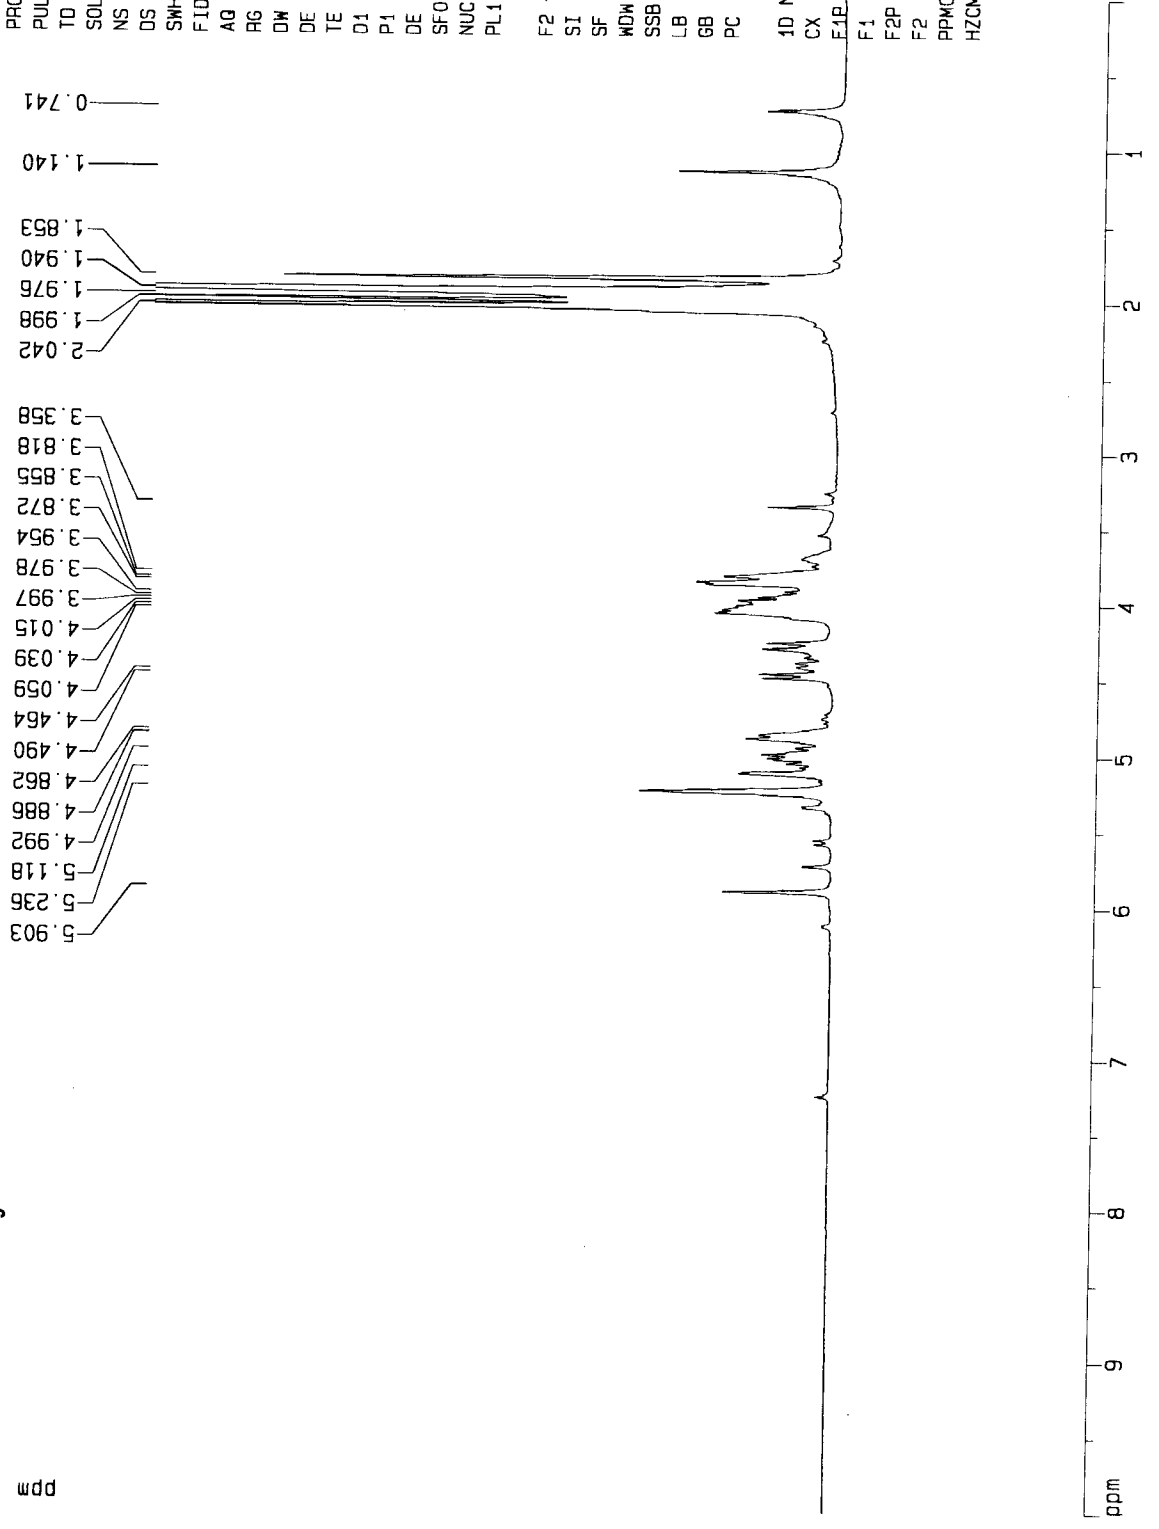

Current Data Parameters  
 NAME GalManOctaAc.1  
 EXPNO 1  
 PROCNO 1

F2 - Acquisition Parameters  
 Date\_ 500000  
 Time 16.40  
 INSTRUM dpx300  
 PROBHD 5 mm GNP 1H  
 PULPROG zgpg  
 TD 65536  
 SOLVENT CDC13  
 NS 800  
 DS 0  
 SWH 22675.736 Hz  
 FIDRES 0.346004 Hz  
 AQ 1.4451188 sec  
 RG 8192  
 DW 22.050 usec  
 DE 4.50 usec  
 TE 300.0 K  
 d11 0.0300000 sec  
 PL12 19.00 dB  
 CPDPRG2 waltz16  
 PCPD2 100.00 usec  
 SF02 300.1322735 MHz  
 NUC2 1H  
 PL2 19.00 dB  
 D1 2.00000000 sec  
 P1 5.70 usec  
 DE 4.50 usec  
 SF01 75.4735300 MHz  
 NUC1 13C  
 PL1 -4.00 dB

F2 - Processing parameters  
 SI 32768  
 SF 75.4677569 MHz  
 MDM EM  
 SSB 0  
 LB 2.00 Hz  
 GB 0  
 PC 1.00

1D NMR plot parameters  
 CX 20.00 cm  
 F1P 200.000 ppm  
 F1 15093.55 Hz  
 F2P 0.000 ppm  
 F2 0.00 Hz  
 PPMCM 10.00000 ppm/cm  
 HZCM 754.67761 Hz/cm

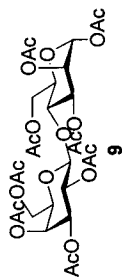

170.15  
170.09  
169.88  
169.79  
169.39  
169.26  
169.19  
169.02  
168.04

100.98  
100.70  
100.65  
90.21  
90.11  
77.50  
77.08  
76.65  
73.62  
70.82  
70.72  
70.37  
69.03  
68.99  
68.24  
66.54  
62.02  
60.79

29.41  
20.63  
20.53  
20.47  
20.36  
20.24

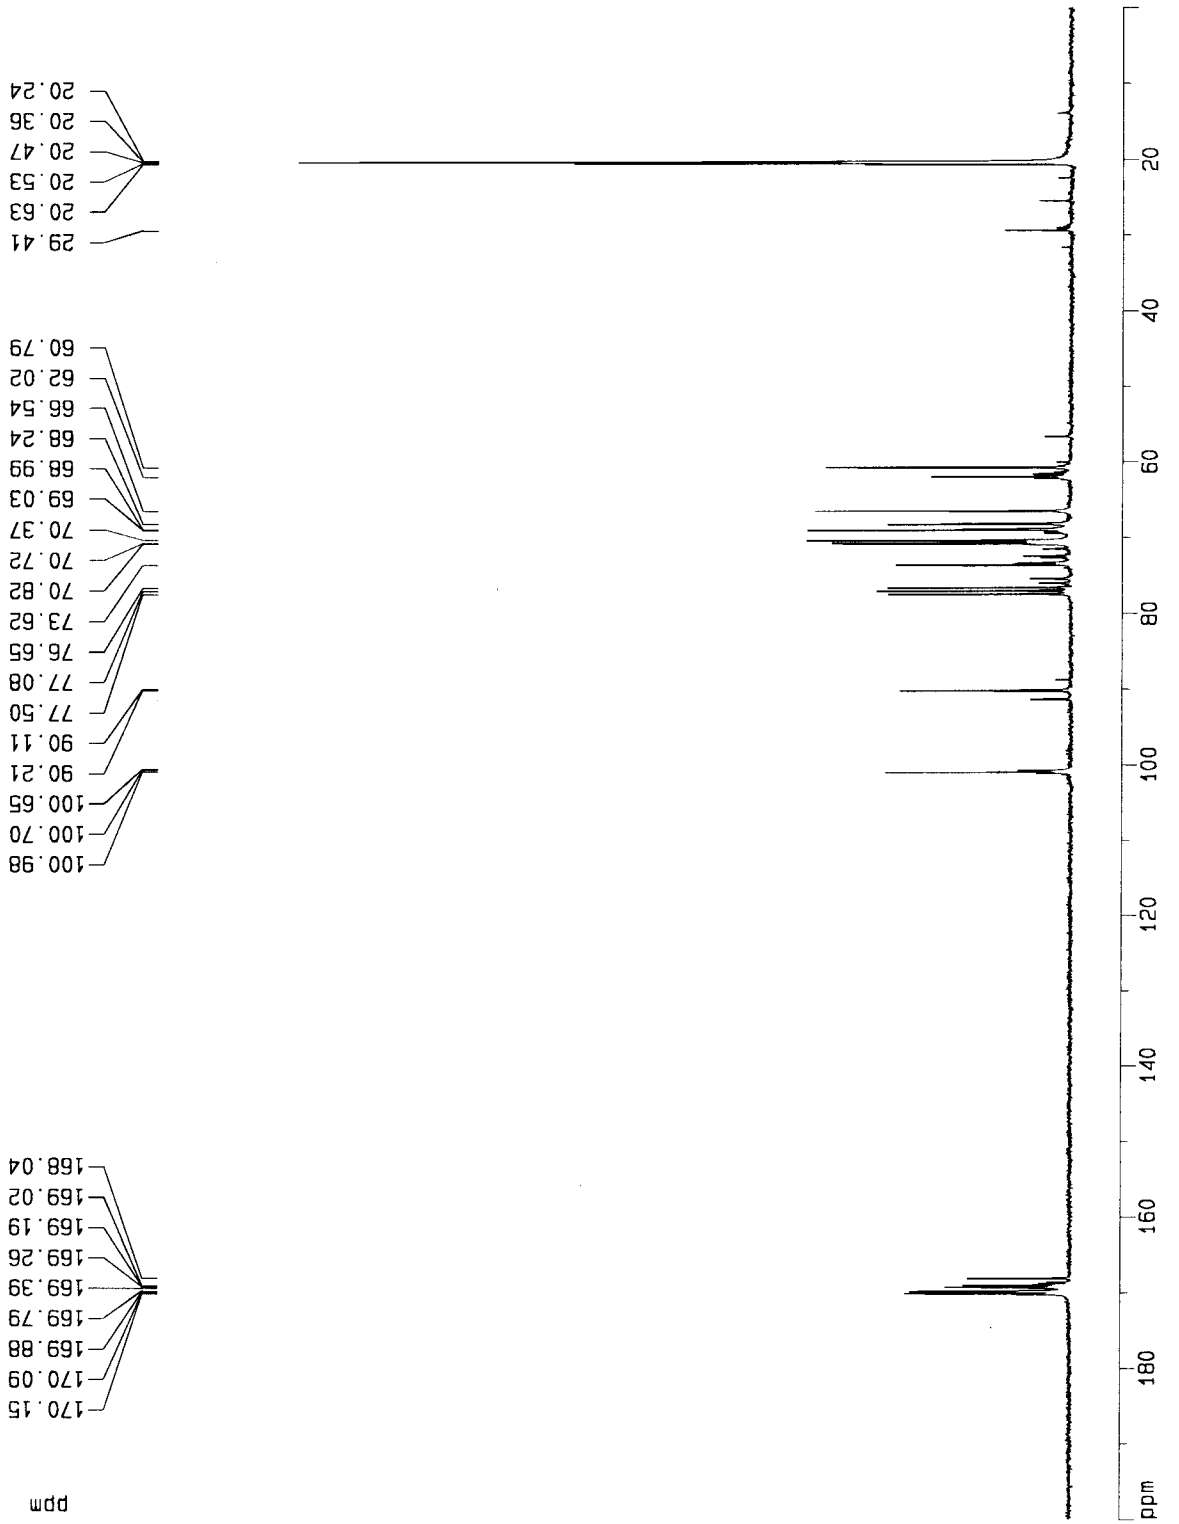

Current Data Parameters  
 NAME DR-TBS-Ac-GM  
 EXPNO 1  
 PROCNO 1

F2 - Acquisition Parameters

Date\_ 500000  
 Time 9.31  
 INSTRUM drx300  
 PROBHD 5 mm GNP 1H  
 PULPROG zg  
 TD 32768  
 SOLVENT CDC13  
 NS 40  
 DS 0  
 SWH 3591.954 Hz  
 FIDRES 0.109618 Hz  
 AQ 4.5613556 sec  
 RG 362  
 DW 139.200 usec  
 DE 4.50 usec  
 TE 300.0 K  
 D1 1.0000000 sec  
 P1 8.40 usec  
 DE 4.50 usec  
 SF01 300.1315200 MHz  
 NUC1 1H  
 PL1 -4.00 dB

F2 - Processing parameters

SI 32768  
 SF 300.1300086 MHz  
 WDW EM  
 SSB 0  
 LB 0.00 Hz  
 GB 0  
 PC 1.00

1D NMR plot parameters

CX 20.00 cm  
 F1P 10.000 ppm  
 F1 3001.30 Hz  
 F2P 1.000 ppm  
 F2 300.13 Hz  
 PPMCM 0.45000 ppm/cm  
 HZCM 135.05850 Hz/cm

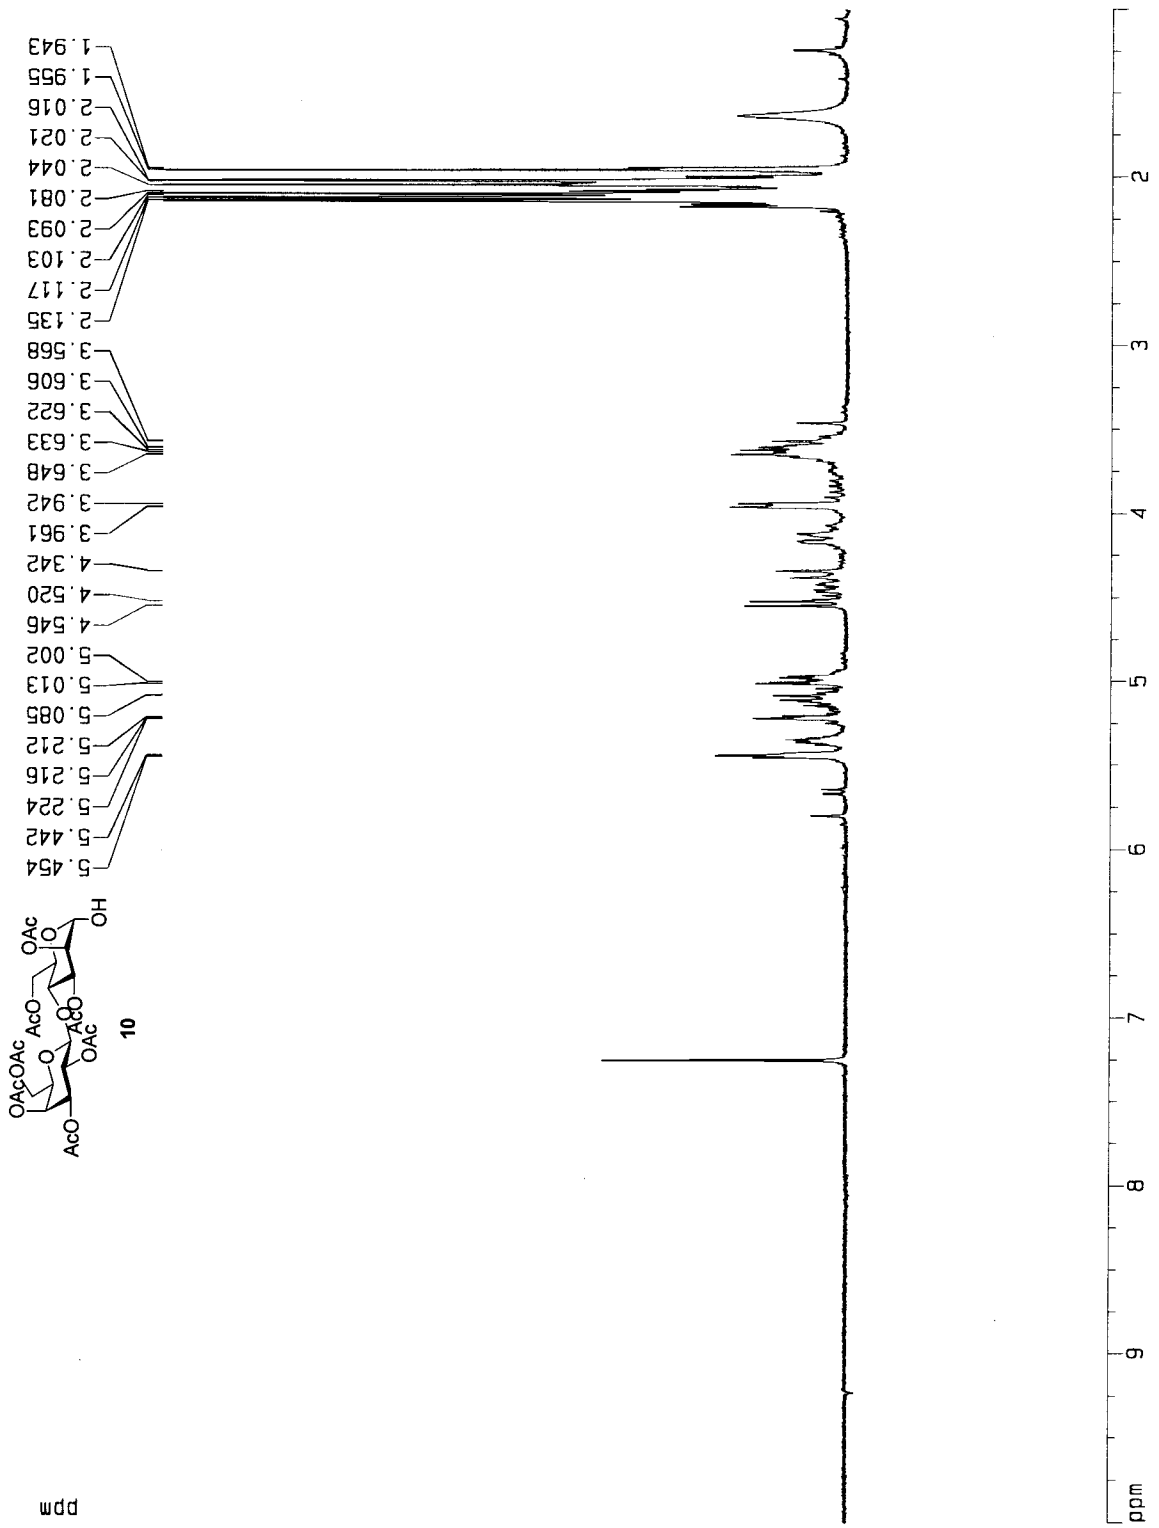

Current Data Parameters  
 NAME DR-4-73.13C  
 EXPNO 1  
 PROCNO 1

F2 - Acquisition Parameters

Date\_ 500000  
 Time 17.31  
 INSTRUM dpX300  
 PROBHD 5 mm QNP 1H  
 PULPROG zgpg  
 TD 65536  
 SOLVENT CDCl3  
 NS 3823  
 DS 0  
 SNH 22675.736 Hz  
 FIDRES 0.346004 Hz  
 AQ 1.445188 sec  
 RG 8192  
 DW 22.050 usec  
 DE 4.50 usec  
 TE 300.0 K  
 d11 0.0300000 sec  
 PL12 19.00 dB  
 CPDPRG2 waltz16  
 PCPD2 100.00 usec  
 SF02 300.1322735 MHz  
 NUC2 1H  
 PL2 19.00 dB  
 D1 2.0000000 sec  
 P1 5.70 usec  
 DE 4.50 usec  
 SF01 75.4735300 MHz  
 NUC1 13C  
 PL1 -4.00 dB

F2 - Processing parameters

SI 32768  
 SF 75.4677569 MHz  
 NDM EM  
 SSB 0  
 LB 0.30 Hz  
 GB 0  
 PC 1.00

1D NMR plot parameters

CX 20.00 cm  
 F1P 195.650 ppm  
 F1 14765.24 Hz  
 F2P -26.276 ppm  
 F2 -1983.03 Hz  
 PPMCM 11.09630 ppm/cm  
 HZCM 837.41321 Hz/cm

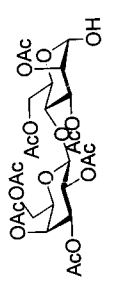

10

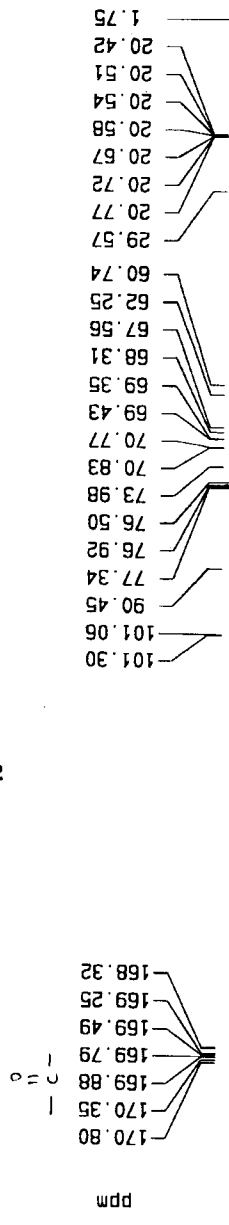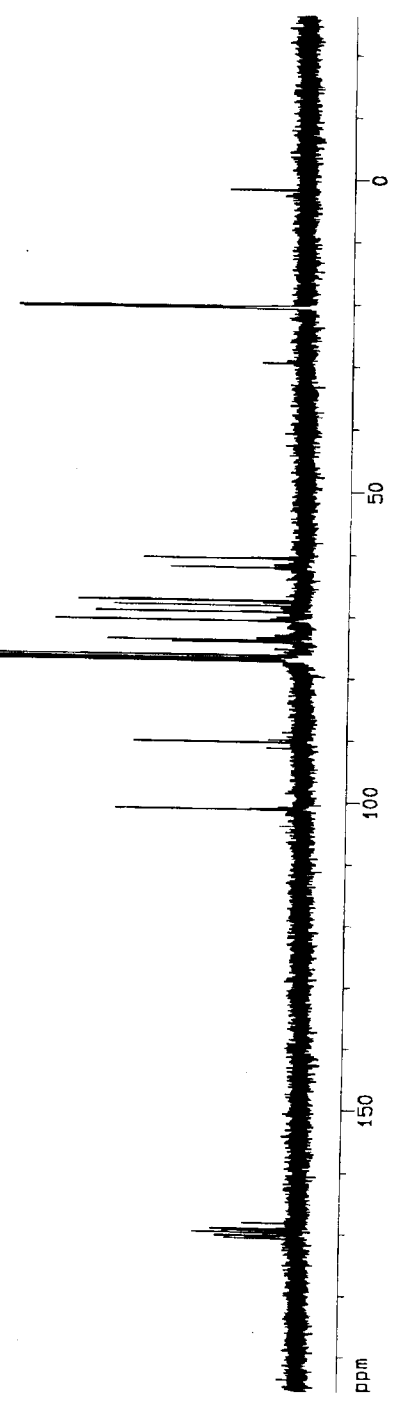

Current Data Parameters  
 NAME DR-6-86  
 EXPNO 1  
 PROCNO 1

F2 - Acquisition Parameters

Date\_ 500000  
 Time 12:58  
 INSTRUM drx300  
 PROBHD 5 mm GNP 1H  
 PULPROG zg  
 TD 32768  
 SOLVENT CDC13  
 NS 13  
 DS 0  
 SMH 3591.954 Hz  
 FIDRES 0.109618 Hz  
 AQ 4.5613556 sec  
 RG 181  
 DW 139.200 usec  
 DE 4.50 usec  
 TE 300.0 K  
 D1 1.0000000 sec  
 P1 8.40 usec  
 DE 4.50 usec  
 SF01 300.1315200 MHz  
 NUC1 1H  
 PL1 -4.00 dB

F2 - Processing parameters

SI 32768  
 SF 300.1300086 MHz  
 WDW EM  
 SSB 0  
 LB 0.00 Hz  
 GB 0  
 PC 1.00  
 1D NMR plot parameters  
 CX 20.00 cm  
 F1P 10.000 ppm  
 F1 3001.30 Hz  
 F2P 0.300 ppm  
 F2 90.04 Hz  
 PPMCM 0.48500 ppm/cm  
 HZCM 145.56305 Hz/cm

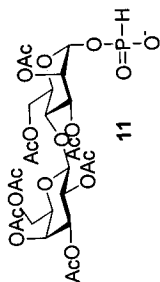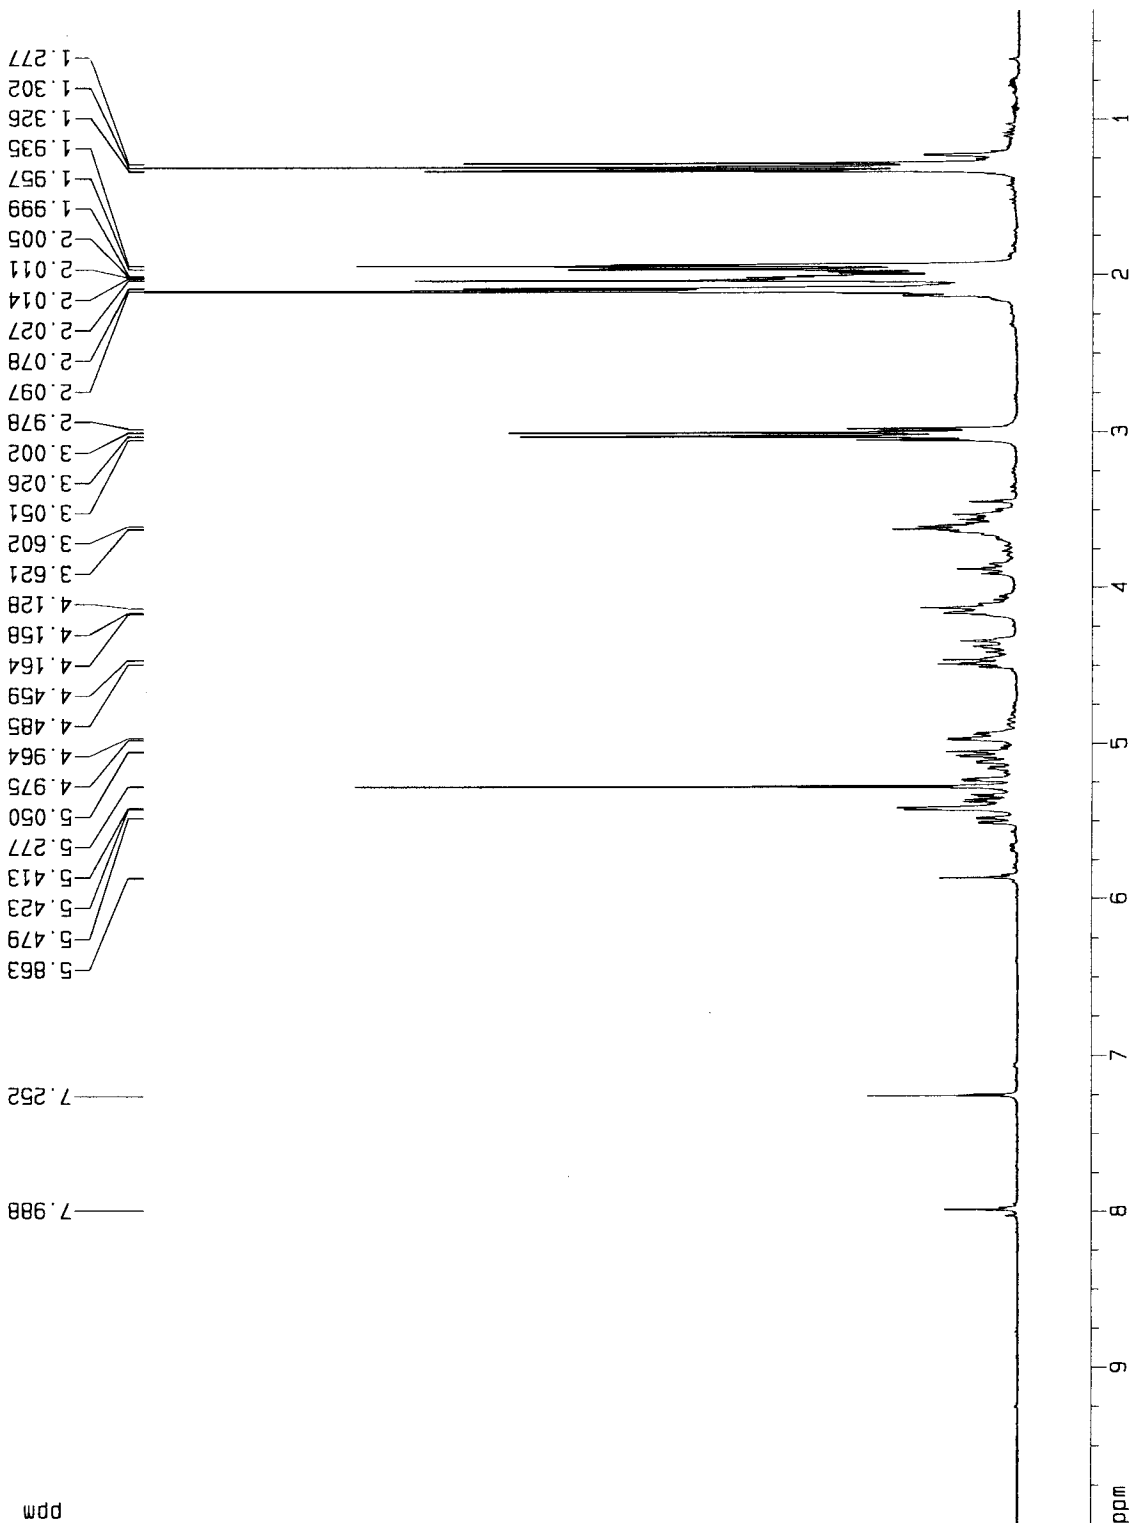

Current Data Parameters  
 NAME DR-6-86.13C  
 EXPNO 1  
 PROCNO 1

F2 - Acquisition Parameters

Date\_ 500000  
 Time 13.06  
 INSTRUM drx300  
 PROBHD 5 mm GNP 1H  
 PULPROG zgdc  
 TD 65536  
 SOLVENT CDCl3  
 NS 787  
 DS 0  
 SWH 22675.736 Hz  
 FIDRES 0.346004 Hz  
 AQ 1.445188 sec  
 RG 8192  
 DW 22.050 usec  
 DE 4.50 usec  
 TE 300.0 K  
 d11 0.0300000 sec  
 PL12 19.00 dB  
 CPDPRG2 waltz16  
 PCPD2 100.00 usec  
 SF02 300.1322735 MHz  
 NUC2 1H  
 PL2 19.00 dB  
 D1 2.0000000 sec  
 P1 5.70 usec  
 DE 4.50 usec  
 SF01 75.4735300 MHz  
 NUC1 13C  
 PL1 -4.00 dB

F2 - Processing parameters

SI 32768  
 SF 75.4677569 MHz  
 WDW EM  
 SSB 0  
 LB 2.00 Hz  
 GB 0  
 PC 1.00

1D NMR plot parameters

CX 20.00 cm  
 F1P 200.000 ppm  
 F1 15093.55 Hz  
 F2P 0.000 ppm  
 F2 0.00 Hz  
 PPMCM 10.00000 ppm/cm  
 HZCM 754.67761 Hz/cm

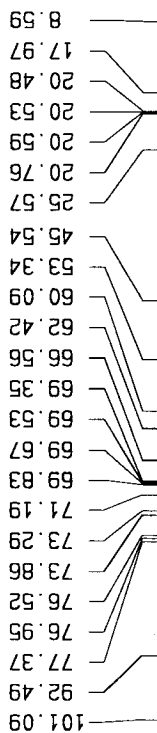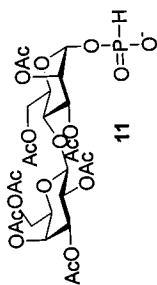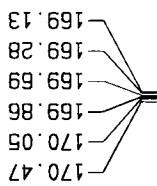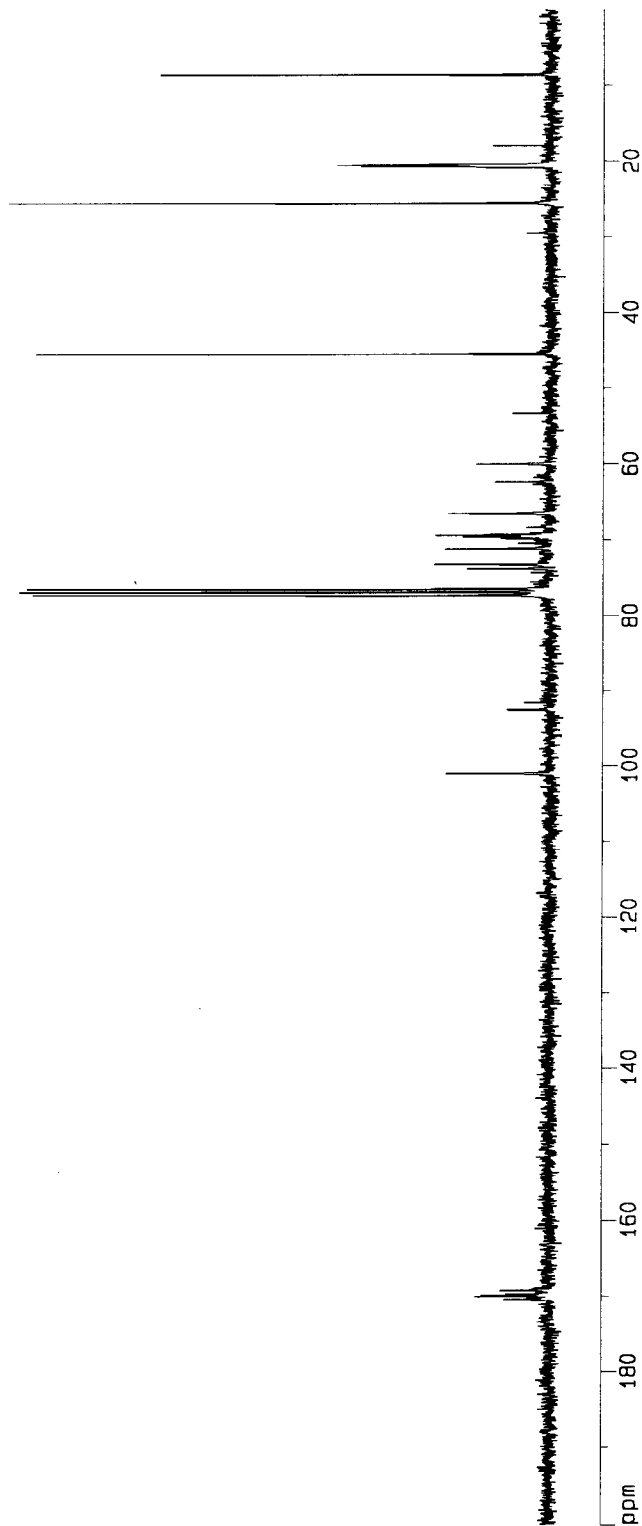



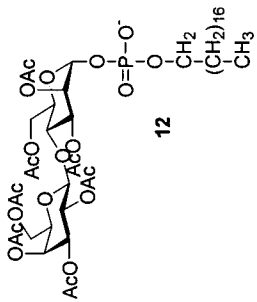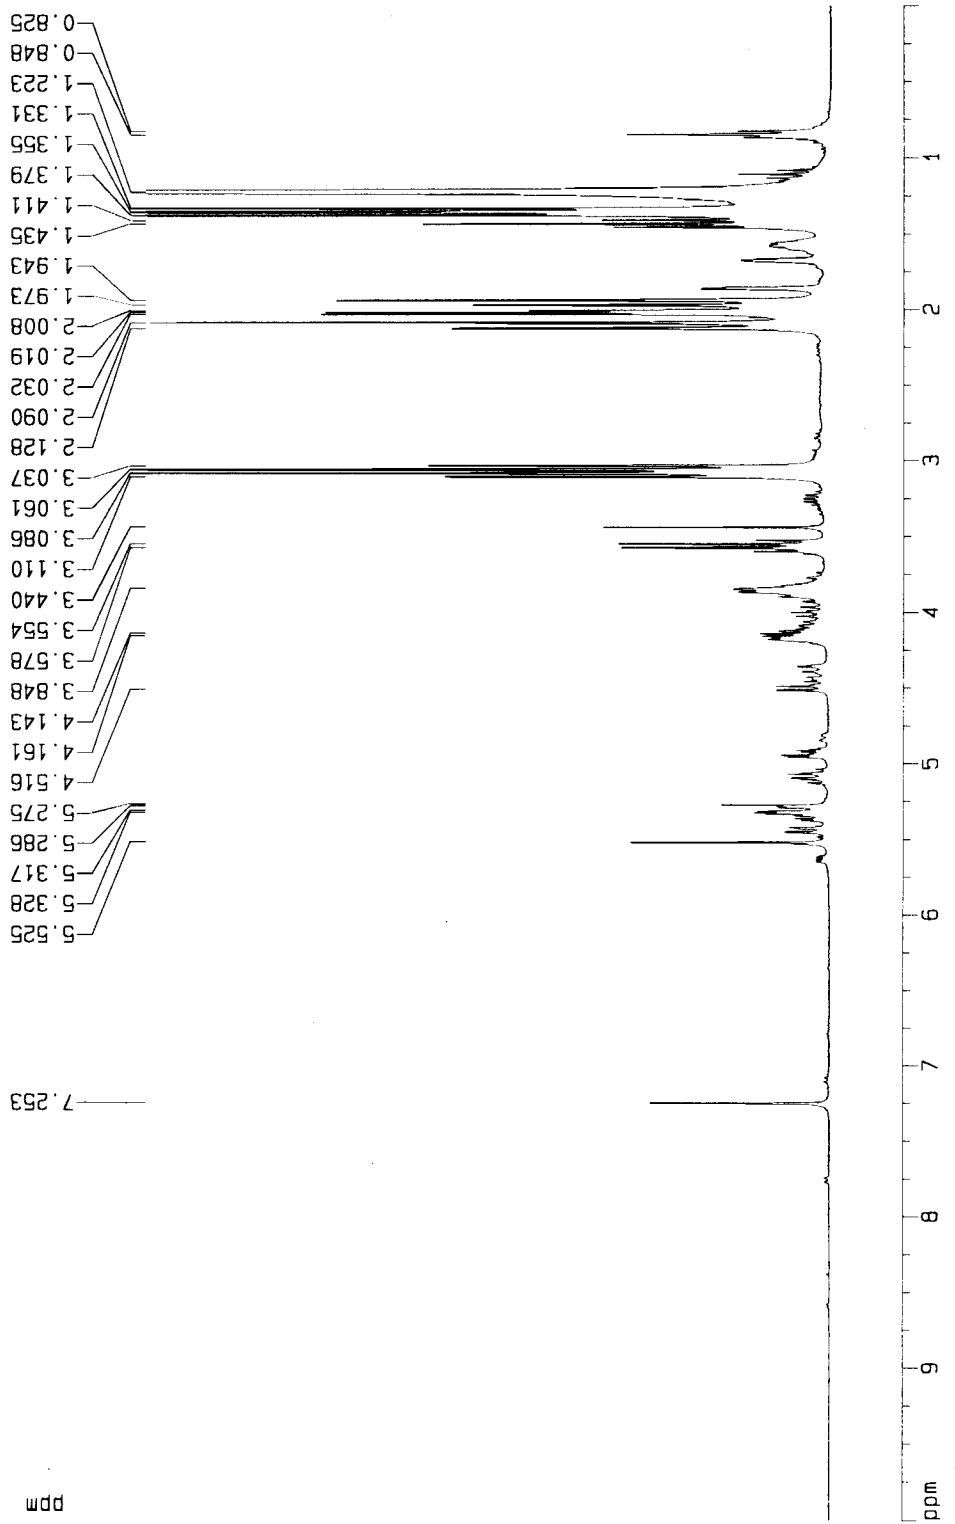

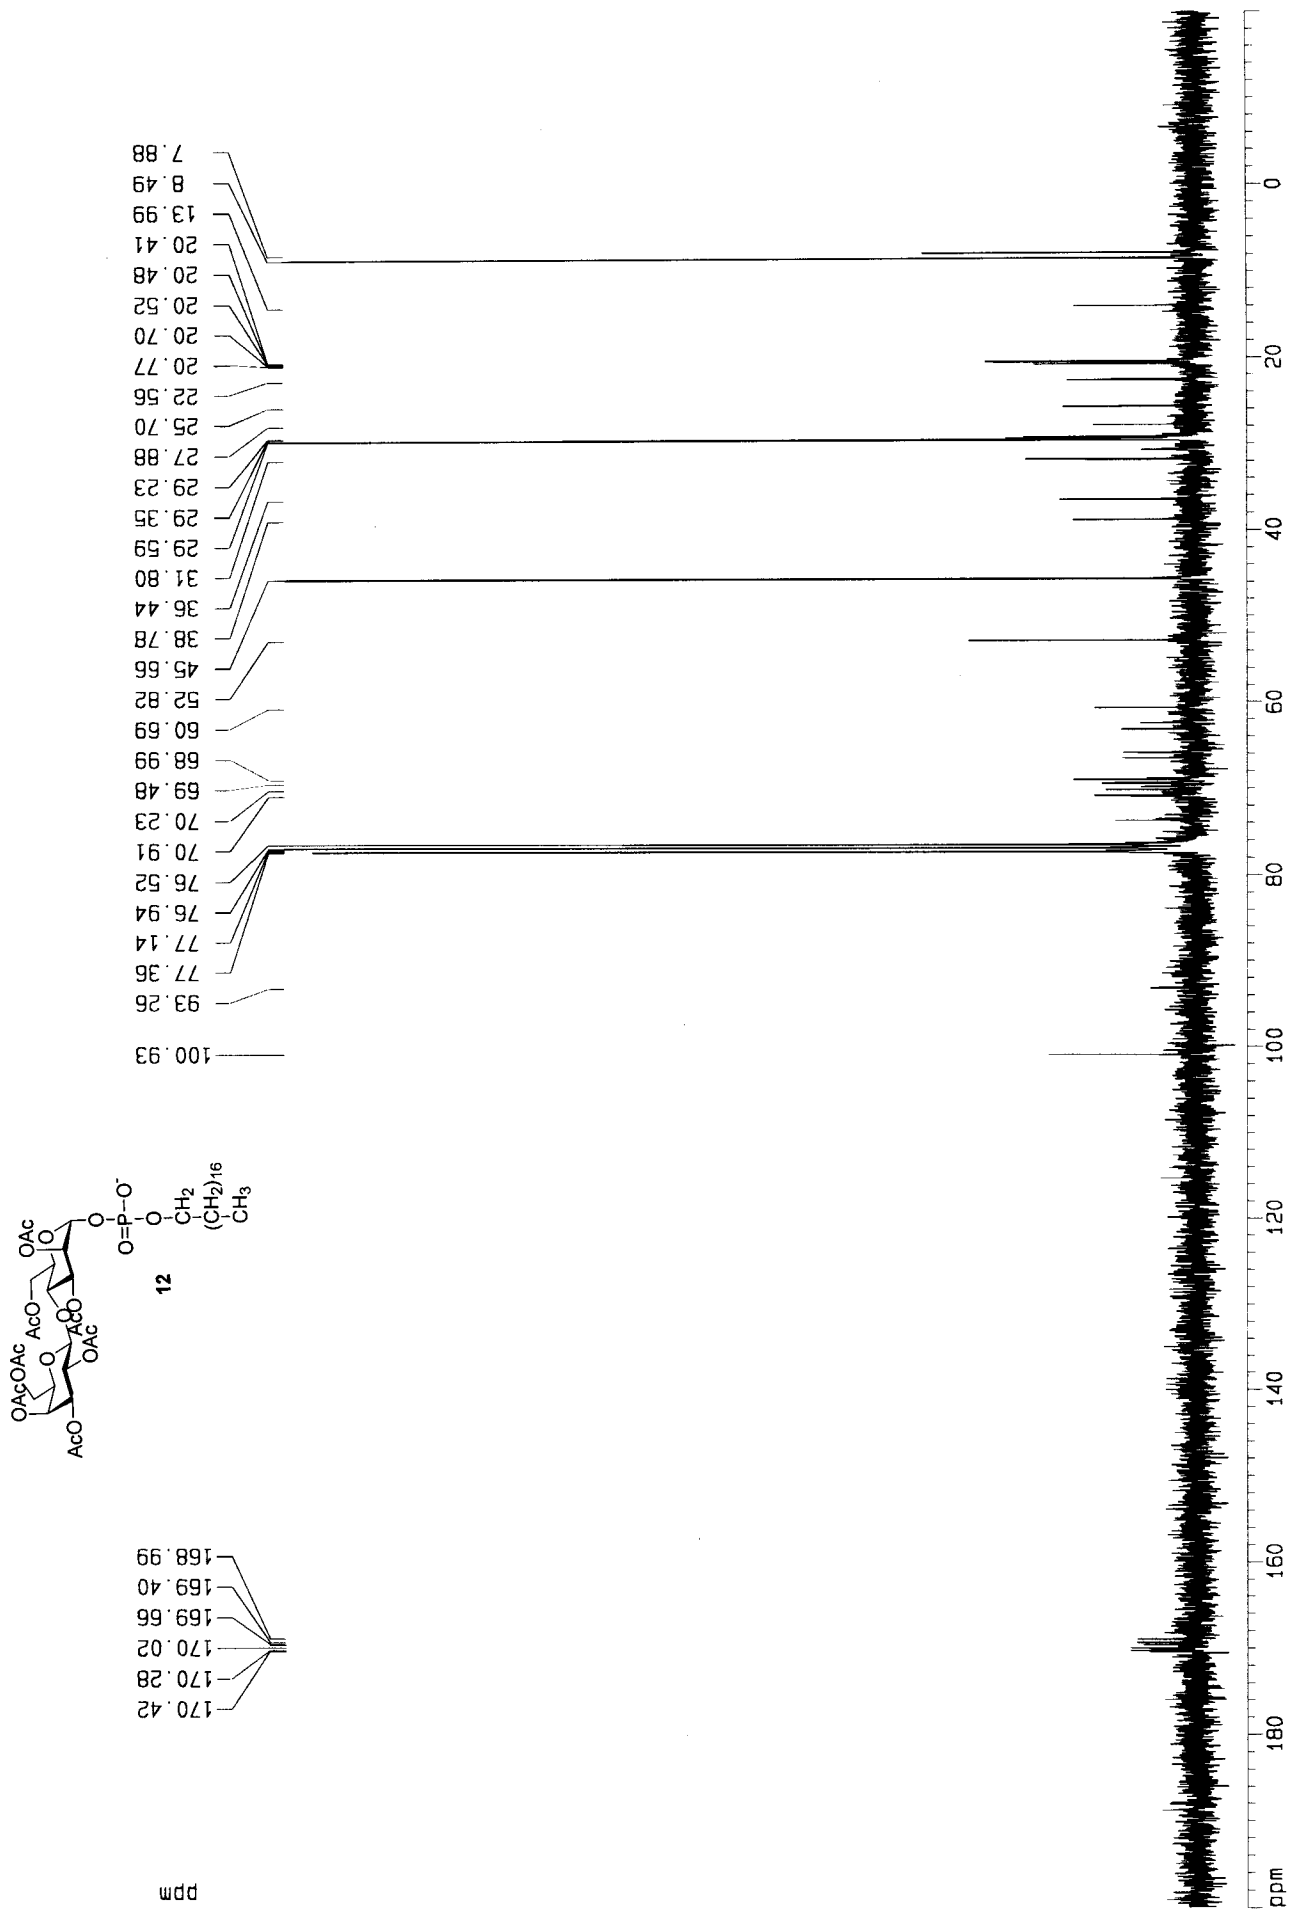

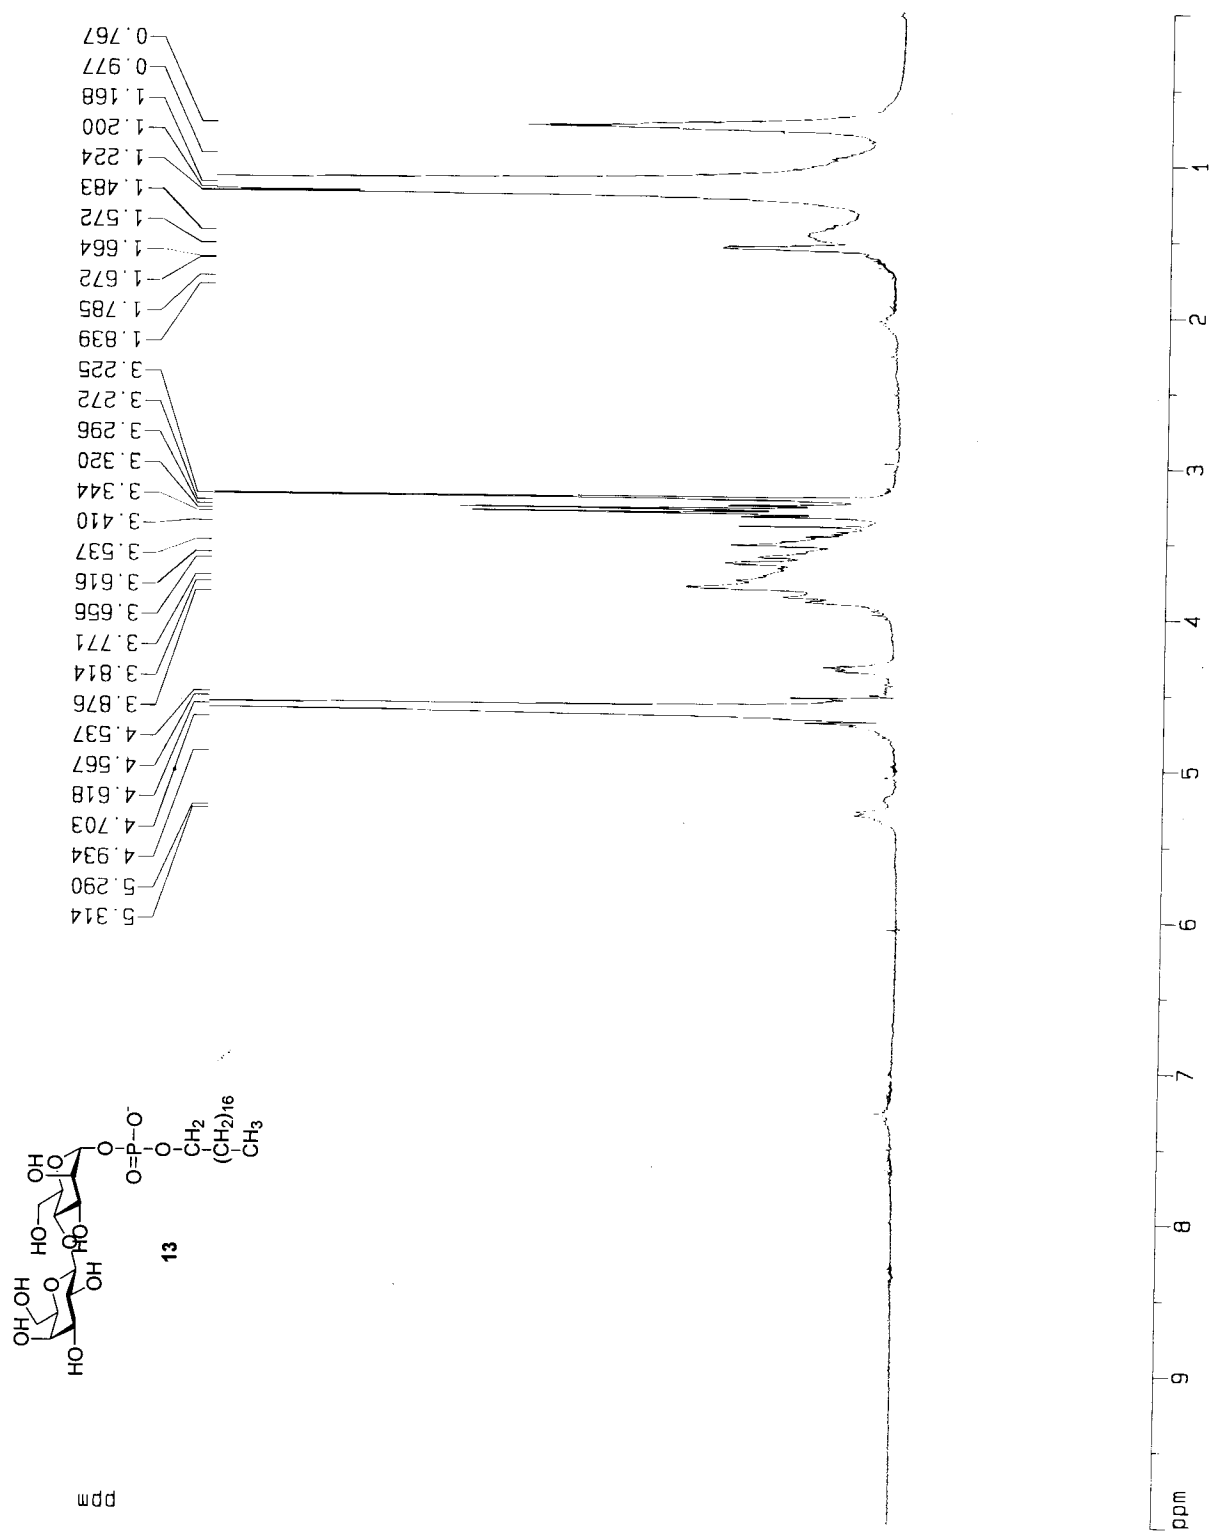

Current Data Parameters  
 NAME RAV.13C  
 EXPNO 2  
 PROCNO 1

F2 - Acquisition Parameters

Date\_ 500000  
 Time 11.53  
 INSTRUM grx300  
 PROBHD 5 mm GNP 1H  
 PULPROG zgdc  
 TD 65536  
 SOLVENT CDCl3  
 NS 10000  
 DS 0  
 SWH 22675.736 Hz  
 FIDRES 0.346004 Hz  
 AQ 1.4451188 sec  
 RG 8192  
 DW 22.050 usec  
 DE 4.50 usec  
 TE 300.0 K  
 d11 0.0300000 sec  
 PL12 19.00 dB  
 CPDPRG2 waitz16  
 PCPD2 100.00 usec  
 SF02 300.1322735 MHz  
 NUC2 1H  
 PL2 19.00 dB  
 D1 2.0000000 sec  
 P1 5.70 usec  
 DE 4.50 usec  
 SF01 75.4735300 MHz  
 NUC1 13C  
 PL1 -4.00 dB

F2 - Processing parameters

SI 32768  
 SF 75.4677569 MHz  
 WDM EM  
 SSB 0  
 LB 1.00 Hz  
 GB 0  
 PC 1.00

1D NMR plot parameters

CX 20.00 cm  
 F1P 200.000 ppm  
 F1 15093.55 Hz  
 F2P 0.000 ppm  
 F2 0.00 Hz  
 PPMCM 10.00000 ppm/cm  
 HZCM 754.67761 Hz/cm

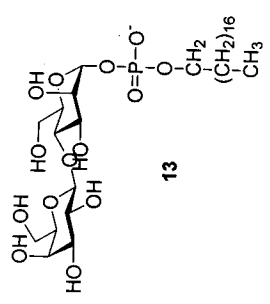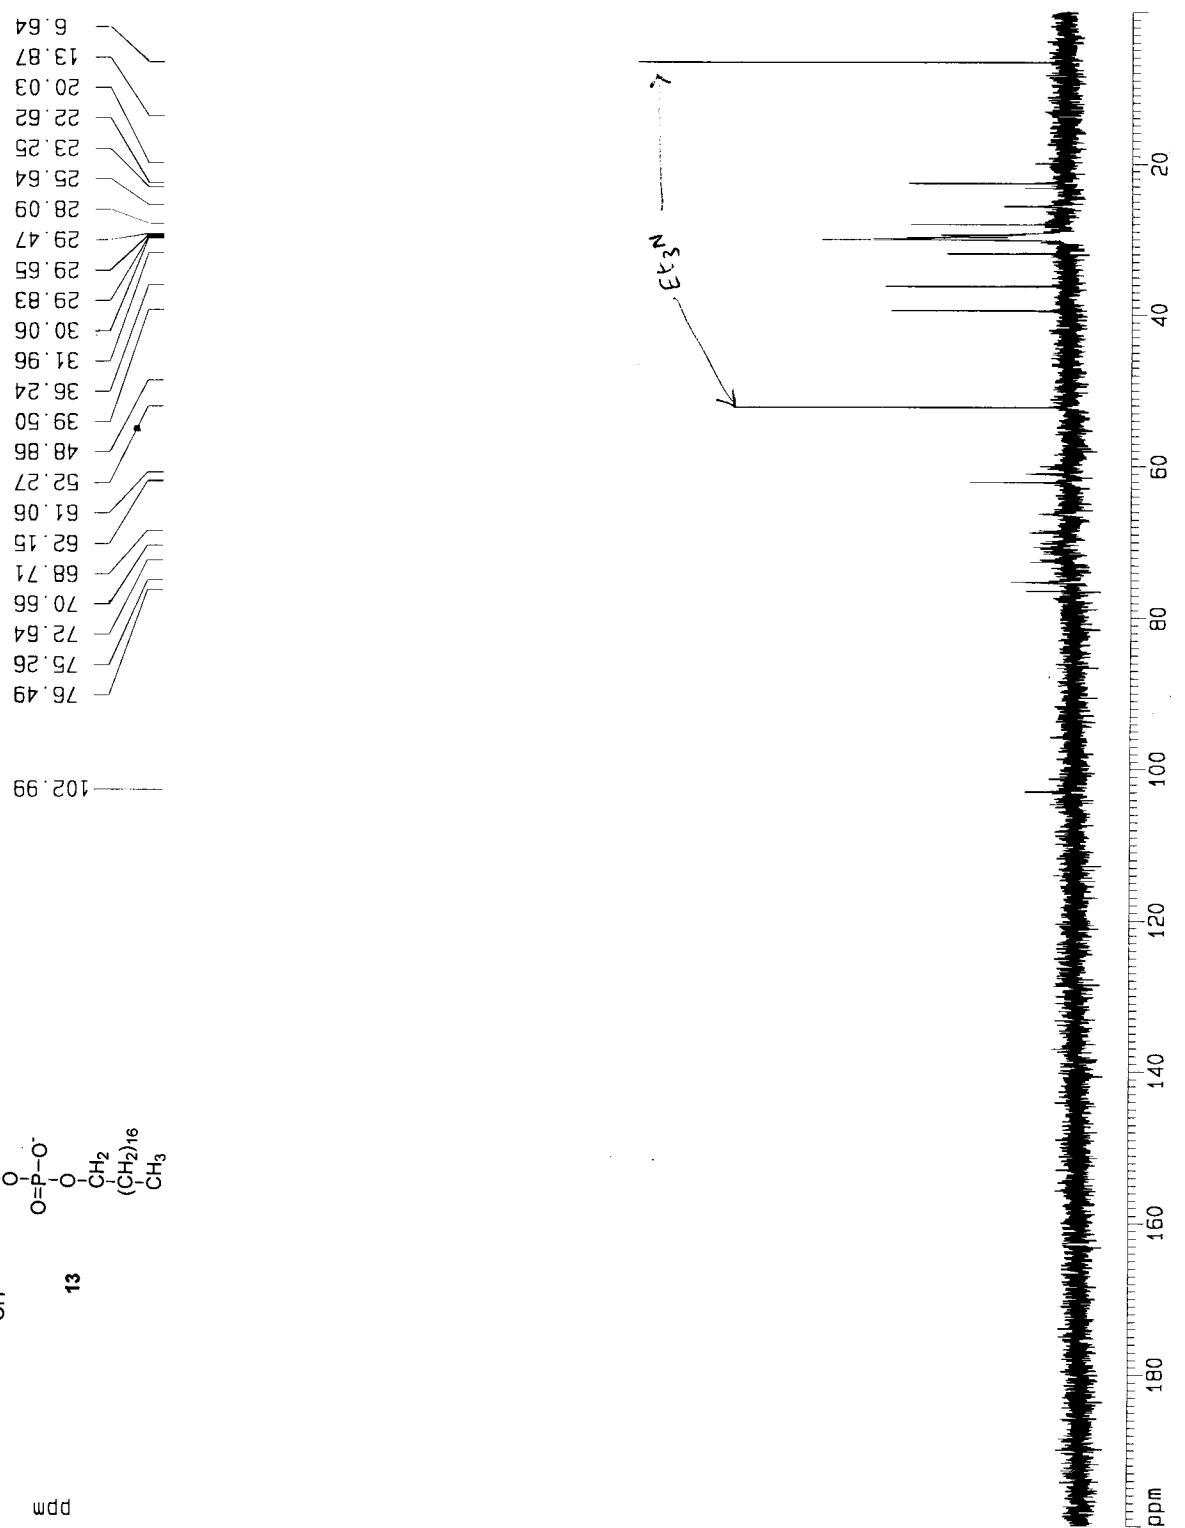

Supplement: b418247b.pdf [file b418247b.pdf]
